1 **A positive feedback loop mediates crosstalk between calcium, cyclic nucleotide**  
2 **and lipid signalling in *Toxoplasma gondii*.**

3 Caia Dominicus<sup>1,\$</sup>, Stephanie D. Nofal<sup>1,\$</sup>, Malgorzata Broncel<sup>1,2</sup>, Nicholas J. Katris<sup>3</sup>,  
4 Helen R. Flynn<sup>2</sup>, Gustavo Arrizabalaga<sup>4</sup>, Cyrille Y. Botté<sup>3</sup>, Brandon M. Invergo<sup>5</sup>, Moritz  
5 Treeck<sup>1,\*</sup>.

6

7 <sup>1</sup> Signalling in Apicomplexan Parasites Laboratory, The Francis Crick Institute, 1  
8 Midland Road, NW1 1AT, London, United Kingdom

9 <sup>2</sup> Protein Analysis and Proteomics Platform, The Francis Crick Institute, 1 Midland Road,  
10 NW1 1AT, London, United Kingdom

11 <sup>3</sup> Apicolipid group, Institut Albert Bonniot UMR5309, CNRS, Université Grenoble Alpes,  
12 INSERM, Domaine de la Merci, 38700, La Tronche, France

13 <sup>4</sup> University of Indianapolis, School of Medicine, 635 Bernhill Drive, 46202 Indianapolis,  
14 United States of America

15 <sup>5</sup> Translational Research Exchange @ Exeter, University of Exeter, Exeter, UK

16 \$ These authors contributed equally to the work

17 \* Correspondence: moritz.treeck@crick.ac.uk

18 **Abstract**

19 Fundamental processes of obligate intracellular parasites, such as *Toxoplasma gondii*  
20 and *Plasmodium falciparum*, are controlled by a set of plant-like calcium dependent  
21 kinases (CDPKs), the conserved cAMP- and cGMP-dependent protein kinases (PKA and  
22 PKG), secondary messengers and lipid signalling. While some major components of the  
23 signalling networks have been identified, how these are connected remains largely  
24 unknown. Here, we compare the phospho-signalling networks during *Toxoplasma* egress  
25 from its host cell by artificially raising cGMP or calcium levels to activate PKG or CDPKs,  
26 respectively. We show that both these inducers trigger near identical signalling pathways  
27 and provide evidence for a positive feedback loop involving CDPK3. We measure  
28 phospho- and lipid signalling in parasites treated with the Ca<sup>2+</sup> ionophore A23187 in a  
29 sub-minute timecourse and show CDPK3-dependent regulation of diacylglycerol levels

30 and increased phosphorylation of four phosphodiesterases (PDEs), suggesting their  
31 function in the feedback loop. Disruption of CDPK3 leads to elevated cAMP levels and  
32 inhibition of PKA signalling rescues the egress defect of  $\Delta$ CDPK3 parasites treated with  
33 A23187. Biochemical analysis of the four PDEs identifies PDE2 as the only cAMP-specific  
34 PDE among these candidates, while the other PDEs are cGMP specific, two of which are  
35 inhibited by the predicted PDE inhibitor BIPPO. Conditional deletion of the four PDEs  
36 supports an important, but non-essential role for PDE1 and PDE2 in growth, with PDE2  
37 controlling A23187-mediated egress. In summary we uncover a positive feedback loop  
38 that enhances signalling during egress and links several signalling pathways together.

## 39 Introduction

40 The Apicomplexa are obligate intracellular parasites that pose a considerable challenge  
41 to human and animal health. The most prevalent member of this phylum, *Toxoplasma*  
42 *gondii*, infects virtually all warm-blooded animals, including an estimated 30% of humans  
43 worldwide (Pappas, Roussos and Falagas, 2009). To ensure its survival in the host,  
44 *Toxoplasma*, like all apicomplexan parasites, must actively invade host cells to initiate  
45 replication inside a parasitophorous vacuole. Following several rounds of division, or in  
46 response to adverse environmental changes, tachyzoites are triggered to egress from  
47 host cells, allowing for subsequent cycles of reinvasion and growth.

48 At any stage during the replicative cycle, *T. gondii* may be triggered to egress from  
49 infected cells in response to deleterious environmental changes. Both extrinsic and  
50 intrinsic stimuli play a role in this process. Extrinsic signals include low potassium ( $K^+$ ),  
51 low pH, and serum albumin (Moudy, Manning and Beckers, 2001; Roiko, Svezhova and  
52 Carruthers, 2014; Brown, Lourido and Sibley, 2016), while the accumulation of  
53 phosphatidic acid (PA) produced in the parasitophorous vacuole serves as an intrinsic  
54 signal to induce natural egress, although this occurs in a more gradual manner after  
55 several cycles of endodyogeny (Bisio *et al.*, 2019).

56 Irrespective of the egress trigger, it is clear that secondary messengers play a key role in  
57 driving the process forward once initiated. Indeed, calcium ( $Ca^{2+}$ ) (Carruthers and Sibley,  
58 1999), purine cyclic nucleotides (cGMP and cAMP) (Wiersma *et al.*, 2004; Ono *et al.*,  
59 2008), and phosphatidic acid (PA) (Bullen *et al.*, 2016) have all been implicated (a model  
60 is shown in Supp Fig. 1). Upon initiation of egress, migration, or invasion, cytosolic  $Ca^{2+}$   
61 levels rise substantially (Lourido and Moreno, 2015). It has been hypothesised that

62 inositol triphosphate (IP<sub>3</sub>), generated by phosphoinositide phospholipase C (PI-PLC)-  
63 mediated cleavage of phosphatidylinositol 4,5-bisphosphate (PIP<sub>2</sub>), opens an (as yet  
64 unidentified) IP<sub>3</sub>-sensitive channel to release Ca<sup>2+</sup> from organelles that otherwise  
65 sequester Ca<sup>2+</sup> during immotile replicative stages (Lovett *et al.*, 2002; Garcia *et al.*, 2017).  
66 Once released, Ca<sup>2+</sup> activates a range of effectors, including a group of 'plant-like' Ca<sup>2+</sup>-  
67 dependent protein kinases (CDPKs) (Billker, Lourido and Sibley, 2009) and proteins  
68 involved in vesicle exocytosis (Farrell *et al.*, 2012). PI-PLC-mediated cleavage of PIP<sub>2</sub>  
69 also leads to the production of diacylglycerol (DAG), which can be interconverted to PA  
70 by the apicomplexan-specific DAG-kinase 1 (DGK1). In conjunction with Ca<sup>2+</sup>, PA is  
71 believed to play an indispensable role in microneme secretion by interacting with the PA  
72 receptor, acylated pleckstrin-homology (PH) domain-containing protein (APH), to  
73 facilitate microneme exocytosis (Bullen *et al.*, 2016).

74 The apicomplexan cGMP-dependent protein kinase (PKG) has been identified as a key  
75 regulator of the above-mentioned Ca<sup>2+</sup> signalling cascade by facilitating the production of  
76 IP<sub>3</sub> precursors (Brochet *et al.*, 2014; Katris *et al.*, 2020). Moreover, several studies have  
77 suggested that PKG, beyond its regulation of the phosphoinositide pathway, may also  
78 exert further control over egress by targeting as yet unidentified substrates required for  
79 microneme secretion (Brown, Lourido and Sibley, 2016; Brown, Long and Sibley, 2017)  
80 In *T. gondii* tachyzoites, the cAMP-dependent protein kinase catalytic subunit 1 (PKAc1),  
81 meanwhile, has been proposed to act as a negative regulator of PKG signalling by  
82 inhibiting egress induced by parasite-dependent acidification (Jia *et al.*, 2017; Uboldi *et al.*,  
83 2018). PKAc1 has been suggested to indirectly regulate PKG by phosphorylating and  
84 possibly activating a putative cGMP phosphodiesterase (PDE) which would result in the  
85 degradation of cGMP and a subsequent down-regulation of PKG activity (Jia *et al.*, 2017).  
86 It is important to note that the cAMP signalling pathway plays no role in regulating *P.*  
87 *falciparum* egress during the blood stages of infection, and instead appears to be  
88 important for mediating invasion (Leykauf *et al.*, 2010; Flueck *et al.*, 2019; Patel *et al.*,  
89 2019).

90 Although many experimental observations place PKG (Brown, Long and Sibley, 2017; Jia  
91 *et al.*, 2017) and phosphoinositide (Bullen *et al.*, 2016) signalling upstream of cytosolic  
92 Ca<sup>2+</sup> flux (and by extension the activation of CDPKs) a further level of interaction between  
93 cGMP signalling and CDPK3 has become apparent (Lourido, Tang and David Sibley,  
94 2012). CDPKs, comprised of a serine/threonine kinase domain fused to a calmodulin-like

95 domain, belong to a superfamily of kinases that feature prominently in the Ca<sup>2+</sup> signalling  
96 pathways of plants and some ciliates. Although *Toxoplasma* has numerous CDPK  
97 encoding genes (Long, Wang and Sibley, 2016), CDPK1 and CDPK3 have been most  
98 extensively studied. CDPK1 has been implicated in microneme exocytosis and the  
99 subsequent initiation of gliding motility (Lourido, Tang and David Sibley, 2012), while  
100 CDPK3 has been shown to be important for rapid Ca<sup>2+</sup> ionophore-induced egress, where  
101 the addition of the calcium ionophore A23187 or BIPPO leads to concerted parasite exit  
102 from the host cell in seconds (Black and Boothroyd, 2000; Garrison *et al.*, 2012; Lourido,  
103 Tang and David Sibley, 2012; McCoy *et al.*, 2012). Intriguingly, while a marked delay in  
104 egress is evident when CDPK3 depleted/inhibited parasites are treated with Ca<sup>2+</sup>  
105 ionophore, this phenotype is partially rescued when tachyzoites are induced to egress  
106 with PDE inhibitors such as zaprinast and BIPPO (Lourido, Tang and David Sibley, 2012;  
107 Howard *et al.*, 2015). The Ca<sup>2+</sup> ionophore A23187 forms lipid-soluble complexes with  
108 divalent cations and is thought to induce a discharge of Ca<sup>2+</sup> from cytosolic stores. Both  
109 zaprinast and BIPPO, known inducers of *Toxoplasma* egress (Lourido, Tang and David  
110 Sibley, 2012; Howard *et al.*, 2015) are thought to induce an elevation in cytosolic cGMP  
111 levels by inhibiting cGMP hydrolysing PDEs, activating PKG activity via elevated cGMP  
112 levels. Accordingly, these findings suggest a compensatory role for PKG signalling in the  
113 absence of CDPK3.

114 While this compensatory mechanism has not been examined in any great detail, it is  
115 possible that PKG and CDPK3 substrate specificity may overlap. Multiple kinases  
116 converging on shared targets can provide multiple layers of regulation to a single  
117 pathway, and this is a known feature of nucleotide-activated kinases, including PKG  
118 (Pearce, Komander and Alessi, 2010). Alternatively, it is plausible that BIPPO's  
119 compensatory effects are explained by a more direct link between CDPK3 and PKG  
120 activity; if CDPK3 were to play a feedback-mediated role in the positive regulation of PKG  
121 signalling, pharmacological activation of PKG (e.g. by BIPPO/zaprinast treatment) would  
122 also diminish the requirement for CDPK3 during egress. Interestingly, this is reminiscent  
123 of the *P. falciparum* CDPK5, where the egress block of CDPK5-deficient parasites can be  
124 rescued by hyperactivation of PKG (Absalon *et al.*, 2018).

125 While the above literature forms a common understanding that CDPKs, PKG, PKA, lipid  
126 and second messenger signalling are important across lifecycle stages in *Toxoplasma*

127 and *Plasmodium* species, how they are spatially and temporally regulated, how they  
128 intersect and how specific signalling outcomes are achieved is not well described.

129 Here, we report on the phospho-, lipid and cyclic nucleotide signalling networks activated  
130 during the pharmacological induction of *Toxoplasma* tachyzoite egress using either  
131 A23187 or BIPPO. Collectively, our data highlights the presence of a feedback loop  
132 between A23187-regulated  $Ca^{2+}$  release and cyclic nucleotide as well as  
133 phosphoinositide signalling. This mechanism appears to be regulated, at least in part, by  
134 CDPK3 and the cAMP-specific phosphodiesterase PDE2.

135

## 136 **Results**

### 137 **Generation of Calcium Reporter Lines to align BIPPO and A23187 signalling** 138 **pathways.**

139 To investigate how the cGMP and calcium signalling pathways converge and differ, we  
140 compared their phosphorylation dynamics using two activators of these pathways:  
141 BIPPO, a PDE inhibitor, and the calcium ionophore A23187.

142 The signalling kinetics following  $Ca^{2+}$  ionophore and BIPPO treatment vary, so we first  
143 determined a timepoint at which both pathways should be comparable. Common to both  
144 treatments is a raise in intracellular calcium levels before egress. We therefore chose  
145 peak intracellular calcium levels as a reference point to facilitate a direct comparison  
146 between BIPPO- and A23187-treated parasites. To this end, we generated a stable  
147 calcium sensor line that co-expresses, through use of a T2A ribosomal skip peptide, an  
148 internal GFP control and the genetically encoded ruby  $Ca^{2+}$  biosensor jRCaMP1b (Alves  
149 *et al.*, 2021) from a single promoter (Fig. 1A-B). The expression of the biosensor did not  
150 have any discernible effects on  $Ca^{2+}$  ionophore (A23187) or BIPPO induced egress rates  
151 (Supp Fig. 2) therefore all subsequent experiments were performed with this line  
152 (henceforth referred to as WT). While some variability of jRCaMP1b fluorescence was  
153 observed between vacuoles at a per-well level upon stimulation, ratiometric quantitation  
154 of jRCaMP1b fluorescence upon BIPPO or A23187 treatment of cytochalasin D-  
155 immobilised parasites illustrated distinct  $Ca^{2+}$  response curves; BIPPO treatment led to a  
156 rapid increase in  $Ca^{2+}$  levels, (Fig. 1Ci), while the cytosolic  $Ca^{2+}$  rise detected upon  
157 A23187 treatment appeared more gradual (Fig. 1Cii). To facilitate optimal alignment, and

158 to account for the rapid kinetics of these signalling pathways, treatment timings of 15s  
159 (BIPPO) and 50s (A23187) were selected for subsequent phosphoproteomics  
160 experiments.

161 **A23187- and BIPPO-treated Wildtype Parasites Exhibit Highly Correlative**  
162 **Phosphoproteomic Responses at temporally aligned calcium flux.**

163 Having identified the optimal BIPPO and A23187 treatment timings to achieve maximal  
164 calcium release, we wanted to identify and compare phosphorylation events that take  
165 place during BIPPO- and A23187-induced signalling cascades at these timepoints. We  
166 used multiplexed tandem-mass-tags (TMT) and LC-MS/MS to quantify the  
167 phosphoproteome of intracellular WT tachyzoites treated with vehicle (DMSO), 50  $\mu$ M  
168 BIPPO (15s) or 8  $\mu$ M A23187 (50s) at 37°C. DMSO-treated parasite samples were  
169 generated in 2 biological replicates, while BIPPO- and A23187-treated samples were  
170 generated in 3 biological replicates (Fig. 1D). At these timepoints parasites remained  
171 intracellular. Samples were lysed, digested, and labelled with different TMT tags. Labelled  
172 samples were pooled and subjected to TiO<sub>2</sub>/Fe-NTA phosphopeptide enrichment prior to  
173 LC-MS/MS analysis. Of note, this experiment (Set 1), also contains two biological  
174 replicates of an A23187-treated calcium-dependent kinase 3 deletion ( $\Delta$ CDPK3) parasite  
175 line. This allowed us to identify  $\Delta$ CDPK3 dependency of signalling events during A23187  
176 and BIPPO induced egress and is explained further below.

177 We quantified changes in phosphorylation states by calculating the log<sub>2</sub>-transformed  
178 intensity ratios (log<sub>2</sub>FC) of A23187- or BIPPO-stimulated WT parasites versus DMSO-  
179 treated WT parasites (DataS1). In total we quantified 7,811 phosphorylation sites across  
180 these conditions.

181 Differentially regulated (DR) phosphorylation sites were selected if the log<sub>2</sub>FC exceeded  
182 3x the median absolute deviation (MAD), rounded to the nearest tenth. This was  
183 log<sub>2</sub>FC>0.5 for up-regulated sites and log<sub>2</sub>FC<-0.5 for down-regulated sites; (Supp Fig.  
184 3A) and applied across all datasets.

185 The rapid signalling progression upon treatment with BIPPO and A23187 inevitably  
186 results in variability in phosphosite intensities between replicates, where despite our best  
187 efforts, signalling may be stopped with several seconds difference between experiments.  
188 As such variability results in poor p-values in classical t-tests and, by extension, an under-

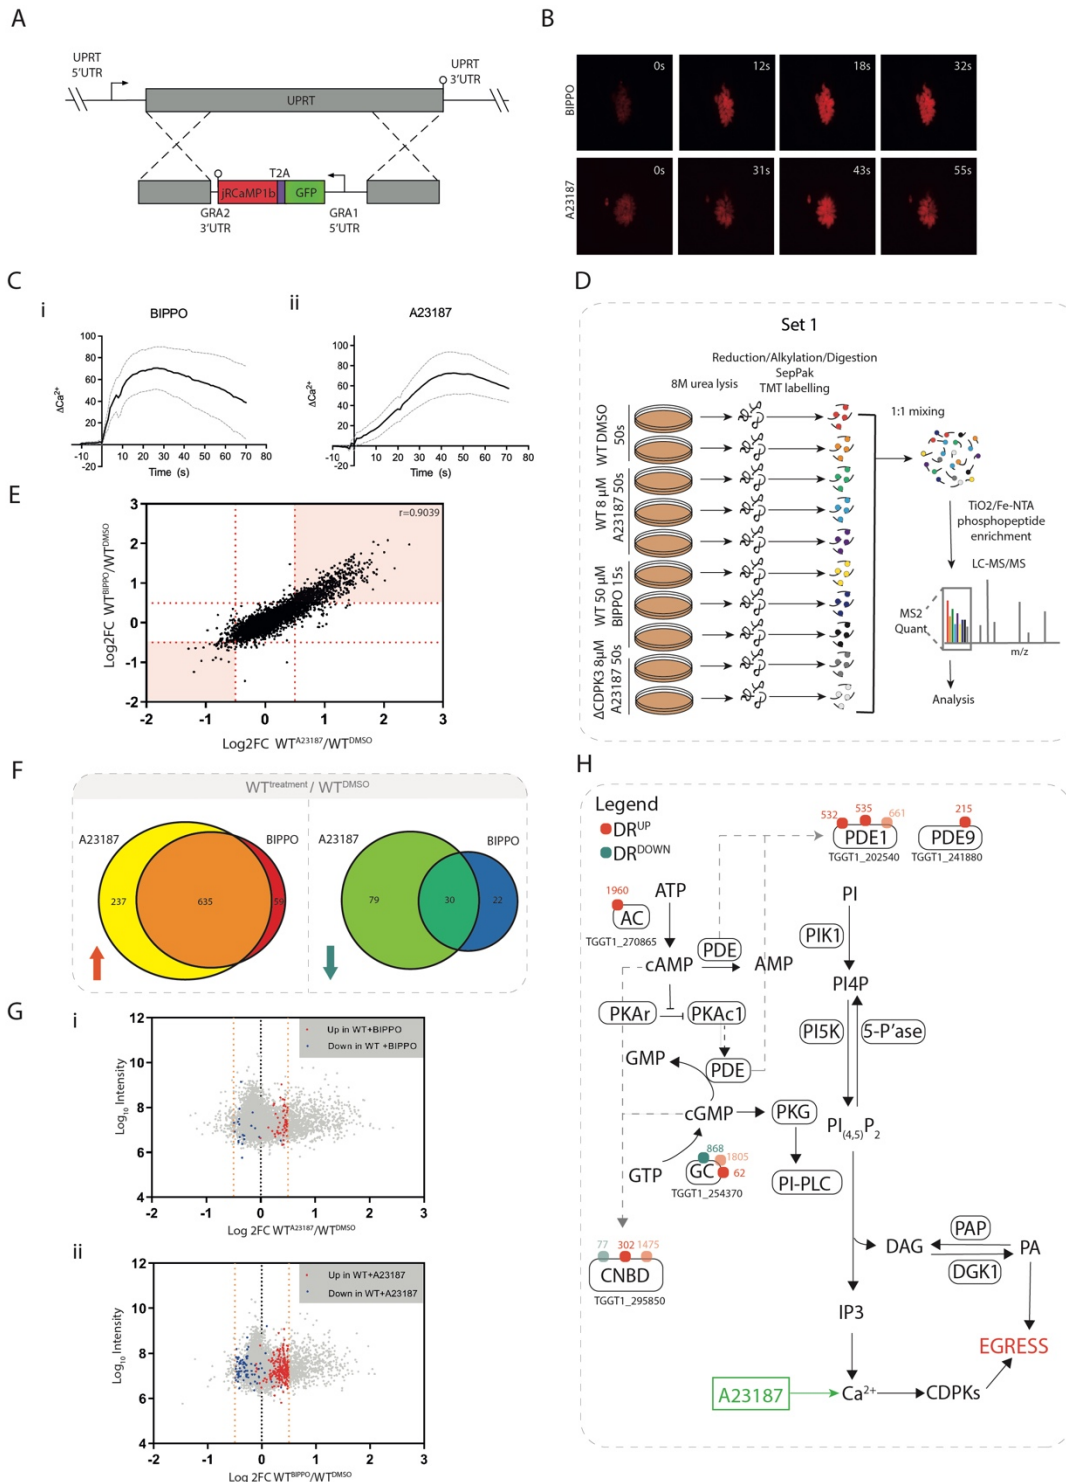

189 **Figure 1. Comparative phosphoproteomics of BIPPO vs A23187-induced GFP-T2A-jRCaMP1b (WT)**  
 190 **parasites at peak cytosolic calcium levels (A)** Generation of the calcium sensor line GFP-T2A-  
 191 jRCaMP1b by integration into the UPRT locus. **(B)** Video microscopy of intracellular GFP-T2A-jRCaMP1b  
 192 parasites (red channel), following addition of 50  $\mu\text{M}$  BIPPO or 8  $\mu\text{M}$  A23187 at 0s. **(C)** Ratiometric tracking  
 193 of mean  $\text{Ca}^{2+}$  response (jRCaMP1b/GFP normalized to 0), following addition of (i) 50  $\mu\text{M}$  BIPPO or (ii) 8  $\mu\text{M}$

194 A23187. Grey dotted lines represent  $\pm$  SEM. Red dotted line indicates the timepoint selected for subsequent  
195 phosphoproteomic experiments. Data was collected from  $\geq 10$  vacuoles (in separate wells) over  $\geq 6$  days.  
196 **(D)** Schematic summary of the TMT-10-plex experiment (set 1) and workflow used to quantify the  
197 phosphoproteomes of intracellular WT tachyzoites treated with 50  $\mu$ M BIPPO (15s) or 8  $\mu$ M A23187 (50s).  
198  $\Delta$ CDPK3 parasites treated with 8  $\mu$ M A23187 (50s) were included to facilitate later analyses. **(E)** Correlation  
199 of phosphosite regulation ( $\log_2$ FC) in BIPPO (y axis) and A23187 (x axis)-treated WT parasites. Each data  
200 point corresponds to a single phosphosite. Red dotted lines represent 3xMAD outlier thresholds used to  
201 determine differential site regulation. Phosphosites that fall within the pink shaded regions are differentially  
202 regulated upon treatment with both BIPPO and A23187. **(F)** Overlap between phosphosites that are  
203 differentially regulated in GFP-T2A-jRCaMP1b (WT) tachyzoites following treatment with 8  $\mu$ M A23187  
204 (50s) or 50  $\mu$ M BIPPO (15s). Red arrow represents up-regulated sites ( $\log_2$ FC $>0.5$ ), blue arrow represents  
205 down-regulated sites ( $\log_2$ FC $<-0.5$ ). Only sites confidently detected in both treatment conditions were  
206 included for analysis. **(G)** Differential phosphosite regulation ( $\log_2$ FC) vs  $\log_{10}$  total reporter intensity  
207 following treatment of WT tachyzoites with **(i)** 8  $\mu$ M A23187 (50s) or **(ii)** 50  $\mu$ M BIPPO (15s). **(H)** Each data  
208 point corresponds to a single phosphosite. Only sites confidently detected in both BIPPO and A23187  
209 samples are shown. In (i) Coloured data points highlight sites that were differentially up- or down-regulated  
210 (red and blue, respectively) upon BIPPO, but not A23187 treatment, while in (ii) coloured data points  
211 highlight sites that were differentially up- or down-regulated (red and blue, respectively) upon A23187, but  
212 not BIPPO treatment. Orange dotted lines represent 3xMAD outlier thresholds used to determine differential  
213 site regulation ( $\log_2$ FC $>0.5$  for up-regulated sites and  $\log_2$ FC $<-0.5$  for down-regulated sites). **(H)**  
214 Differentially A23187-regulated phosphosites detected on targets implicated in the regulation of cyclic  
215 nucleotides. Red and blue dots represent sites that are differentially up- or down-regulated, respectively.  
216 Numbers refer to site position within protein. Dots with reduced opacity represent sites with a localization  
217 score difference $<10$ .

218

219 reporting of true treatment-regulated sites, we did not subject DR sites to further p-value-  
220 based thresholding. However, the reporter intensities associated with DR sites correlated  
221 well across replicates ( $r>0.89$ , Supp Fig. 3B). This suggests that despite some of the  
222 aforementioned replicate variability, the overall trends across replicates were consistent,  
223 and these scores could therefore be confidently averaged to provide values that are  
224 representative of a site's phosphorylation state at the timepoint of interest.

225 Comparison of the  $\log_2$ FCs observed in BIPPO- and A23187-treated samples shows  
226 strong correlation between the phosphorylation responses of these conditions ( $r=0.9039$ )  
227 (Fig. 1E), suggesting that the signalling pathways at these selected timepoints align  
228 sufficiently well to directly compare them.



229 **Phosphoproteomic Analysis Cannot Confidently Distinguish BIPPO- from A23187-**  
230 **Induced Signalling.**

231 To investigate the signalling events that are shared between or are unique to BIPPO and  
232 A23187 treatment, we identified DR sites for each treatment condition. We then identified  
233 DR sites that were successfully quantified in both treatments, which allowed us to  
234 examine their behaviour under both conditions. In total we identified 746 BIPPO and 981  
235 A23187 DR sites. A large overlap was detected between treatments for both up- and  
236 down-regulated phosphosites (DR<sup>UP</sup> and DR<sup>DOWN</sup>, respectively); ~91% of phosphosites  
237 up-regulated following BIPPO treatment showed similar regulation upon A23187 addition  
238 and ~58% of BIPPO down-regulated sites behaved similarly following A23187 treatment  
239 (Fig. 1F).

240 We also observed some dissimilar regulation between conditions; 59 phosphorylation  
241 sites were found to be up-regulated following BIPPO treatment only, while 237 sites were  
242 phosphorylated exclusively following A23187 treatment. Of the DR<sup>DOWN</sup> phosphorylation  
243 sites, 22 were found to be unique to BIPPO treatment, while 79 were unique to A23187  
244 treatment. These treatment-specific sites may originate from distinct signalling pathways,  
245 activated by each of the compounds. To discern whether these disparate site behaviours  
246 are truly treatment-specific effects, or whether they are the result of imperfect alignment  
247 of the treatment timings, we visualised phosphorylation site log<sub>2</sub>FCs following A23187  
248 treatment, and highlighted phosphorylation sites that were only DR following BIPPO  
249 treatment (Fig. 1Gi). Similarly, we also visualised phosphorylation site log<sub>2</sub>FCs following  
250 BIPPO treatment, and highlighted phosphorylation sites that were only DR following  
251 A23187 treatment (Fig. 1Gii). In both instances, most sites approached the DR thresholds  
252 for up- or down-regulation. While this does not preclude the possibility that some of the  
253 BIPPO- and A23187-specific DR<sup>UP/DOWN</sup> sites are regulated in a drug-exclusive manner,  
254 it is likely that the majority of these sites would pass the DR threshold within seconds,  
255 and that minor changes in treatment timing can make the difference between surpassing  
256 the DR threshold or not.

257 Collectively, these findings demonstrate that at temporally aligned calcium release within  
258 the parasite, it is nearly impossible to detect clear signalling features that confidently  
259 distinguish the BIPPO-activated signalling pathway from the signalling cascade activated  
260 upon cytosolic Ca<sup>2+</sup> elevation by A23187 treatment.

261 **A23187 Treatment Leads to Differential Regulation of Targets Implicated in the PKG**  
262 **Signalling Pathway.**

263 A substantial overlap between BIPPO-regulated and A23187-regulated sites was  
264 expected given the increase of cytosolic Ca<sup>2+</sup> in both treatment conditions. However, the  
265 inability to confidently distinguish BIPPO from A23187 signalling was unexpected, as  
266 these agents are believed to initiate egress by activating distinct, albeit interconnected,  
267 signalling responses (Lourido, Tang and David Sibley, 2012). Previous studies have  
268 placed PKG activation upstream of Ca<sup>2+</sup> release (Brochet *et al.*, 2014; Stewart *et al.*,  
269 2017) and it was therefore to our surprise that within the A23187 and BIPPO response  
270 overlap, DR phosphorylation sites were detected on proteins implicated in the catalysis  
271 and hydrolysis of the cyclic nucleotides (cNMPs) cGMP and cAMP, key molecules  
272 involved in PKG activation. Subsequent examination of all A23187-regulated  
273 phosphorylation sites (including those for which we lacked quantifications in BIPPO  
274 samples) identified differential phosphorylation on proteins including, but not limited to,  
275 enzymes important for cNMP signalling: PDEs (TGGT1\_202540 (PDE1) and  
276 TGGT1\_241880 (PDE9)), an adenylate cyclase (TGGT1\_270865), a guanylyl cyclase  
277 (TGGT1\_254370), and a cyclic nucleotide (cNMP) binding domain (CNBD) containing  
278 protein (TGGT1\_295850) (Fig. 1H).

279 The differential phosphorylation of several proteins in the upstream pathway of cNMP  
280 production/regulation hints at a putative Ca<sup>2+</sup>-mediated feedback loop that regulates  
281 cGMP and/or cAMP signalling. The existence of such a feedback mechanism could  
282 account for our inability to confidently discern PKG-specific signalling upon BIPPO  
283 treatment, as such signalling would be activated upon treatment with both BIPPO and  
284 A23187.

285 **Deletion of CDPK3 leads to signalling perturbations in both A23187 and BIPPO**  
286 **treatment conditions.**

287 Following our analyses of BIPPO- and A23187- induced egress, we set out to explore the  
288 role of CDPK3 in these signaling pathways. The observation that BIPPO/zaprinast-  
289 mediated activation of PKG partially compensates for a loss of CDPK3 has led to the  
290 hypothesis that, given the function of both kinases in egress, the kinases' substrate  
291 specificities may overlap (Lourido, Tang and David Sibley, 2012). In such a scenario,

292 BIPPO treatment would facilitate PKG-mediated phosphorylation of CDPK3 targets, thus  
293 overcoming the egress delay otherwise seen in A23187-treated parasites.

294 To identify phosphorylation sites that might fit such criteria, we wanted to identify  
295 phosphorylation sites that are CDPK3-dependent upon A23187s treatment, but CDPK3-  
296 independent upon BIPPO treatment. To do this, we generated a  $\Delta$ CDPK3 parasite line by  
297 replacing the endogenous CDPK3 locus in the RH GFP\_T2A\_jRCaMP1b line with a  
298 HXGPRT expression cassette (henceforth known as  $\Delta$ CDPK3; Fig. 2A) and confirmed  
299 deletion of CDPK3 by PCR (Supp Fig. 4). We performed an egress assay to validate the  
300 known A23187-induced egress delay reported for  $\Delta$ CDPK3 parasites (Black and  
301 Boothroyd, 2000; Garrison *et al.*, 2012; Lourido, Tang and David Sibley, 2012; McCoy *et*  
302 *al.*, 2012). As expected, we found that A23187-induced egress was substantially inhibited  
303 in this line (Fig. 2Bi), while a less severe egress delay was observed in BIPPO-treated  
304  $\Delta$ CDPK3 parasites (Fig. 2Bii). This recapitulates previous findings (Lourido, Tang and  
305 David Sibley, 2012) that activation of PKG partially compensates for a loss of CDPK3.

306 We next quantified phosphorylation events in  $\Delta$ CDPK3 parasites treated with DMSO, 50  
307  $\mu$ M BIPPO (15s) or 8  $\mu$ M A23187 (50s) at 37°C (Fig. 2C) in biological replicates (2x  
308 DMSO, 3x A23187, 3x BIPPO). In this experiment (set 2), we included 2 biological  
309 replicates of BIPPO-treated WT parasites. In conjunction with the ionophore-treated  
310  $\Delta$ CDPK3 parasites included in set 1 (Fig. 1D), this allowed us to identify CDPK3-  
311 dependent phosphorylation sites during BIPPO- and A23187-induced egress (Data S2).  
312 We first identified DR phosphorylation sites across all datasets for which we had  
313 quantifications and tested for CDPK3 dependency. Of the 498 phosphosites detected, 44  
314 sites (~8.5%) were CDPK3-dependent (Fig. 2D, Data S2). 40 sites were classed as DR<sup>UP</sup>;  
315 16 were exclusive to A23187 treatment, 20 were identified upon both A23187 and BIPPO  
316 treatment, and 4 were detected upon BIPPO treatment only. By contrast, only 4 sites were  
317 classed as DR<sup>DOWN</sup>, all in a seemingly A23187-exclusive manner.

318 The 16 phosphorylation sites that show CDPK3 dependency exclusively upon A23187  
319 treatment constituted putative candidates for PKG/CDPK3 substrate overlap. We  
320 reasoned that, if a DR<sup>UP</sup> site was found to be CDPK3-dependent upon A23187 treatment  
321 only, this phosphorylation site should be recovered in  $\Delta$ CDPK3 parasites following BIPPO  
322 treatment. Only 3 of these phosphorylation sites showed this behaviour and were located  
323 on two hypothetical proteins (TGGT1\_243460, TGGT1\_232120) and a DnaJ domain-

324 containing protein (TGGT1\_203380) (Data S2). While these findings do not completely  
 325 rule out the ‘substrate overlap’ theory to account for BIPPO’s compensatory effects, the  
 326 putative overlap is extremely small, and none of these proteins contain predicted domains  
 327 that would explain the rescue of CDPK3 mutants by BIPPO in induced egress.

328 Collectively, our current findings provide more evidence for a  $Ca^{2+}$ -regulated feedback  
 329 loop model than for PKG/CDPK3 substrate overlap.

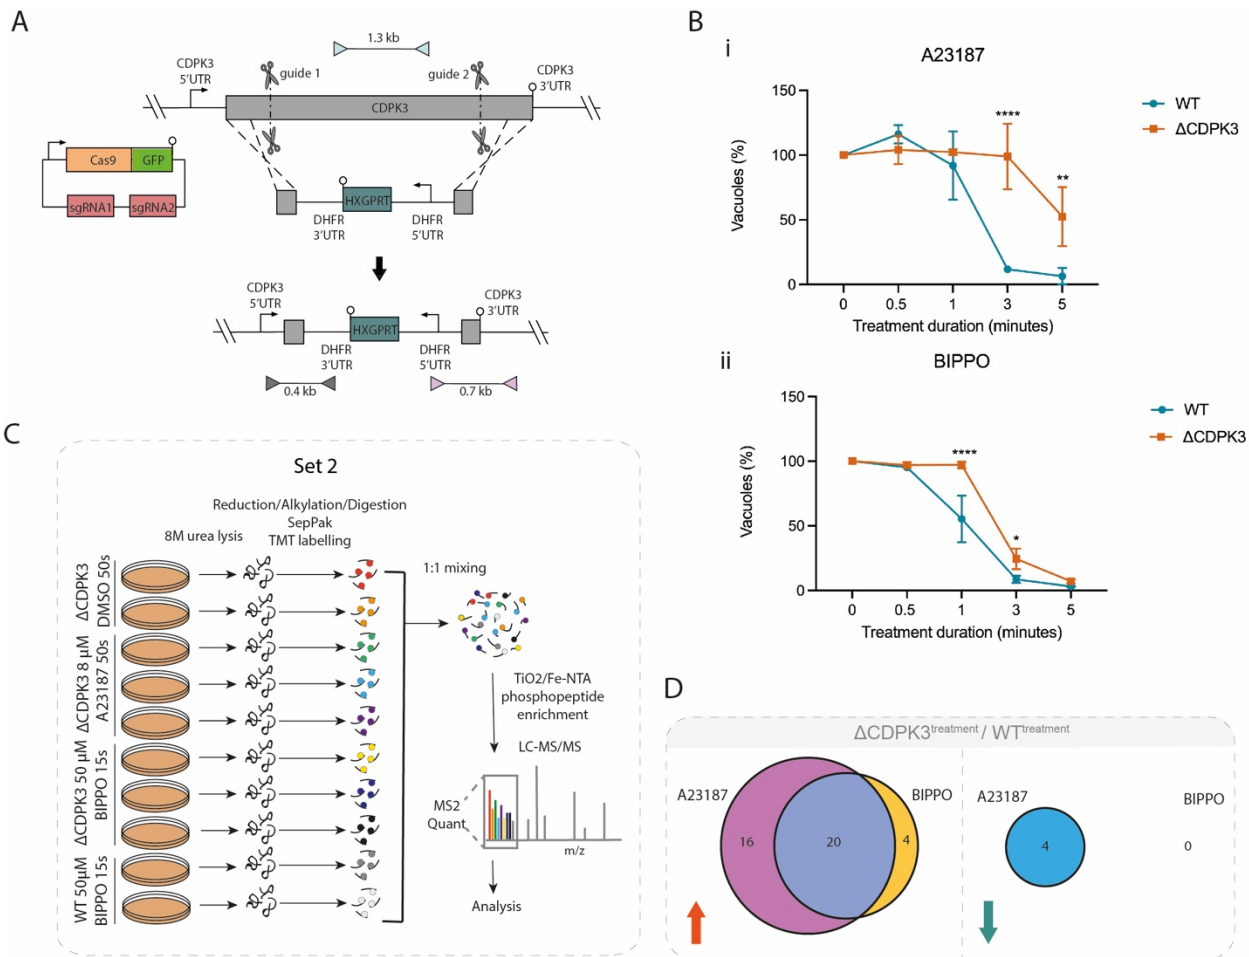

330 **Figure 2. Comparative phosphoproteomics of BIPPO vs A23187-induced GFP-T2A-jRCaMP1b**  
 331  **$\Delta$ CDPK3 parasites at peak cytosolic calcium levels (A)** Generation of the GFP-T2A-jRCaMP1b  
 332  $\Delta$ CDPK3 line using CRISPR/Cas9 to increase site-directed integration. Scissors represent Cas9 cleavage  
 333 sites and lollipops depict stop codons. Coloured triangles represent primer pairs used to detect WT, 5'  
 334 integration and 3' integration loci (light blue, grey and pink respectively). PCR results using these primer  
 335 pairs are shown in Supp Fig. 4 **(B)** Egress assay of GFP-T2A-jRCaMP1b (WT) and GFP-T2A-jRCaMP1b  
 336  $\Delta$ CDPK3 ( $\Delta$ CDPK3) parasites following treatment with **(i)** 8  $\mu$ M A23187 or **(ii)** 50 $\mu$ M BIPPO. Graph shows  
 337 the remaining % of un-egressed vacuoles (relative to untreated) following A23187/BIPPO treatment. Data  
 338 are represented as mean  $\pm$  s.d. (n=3). Two-way ANOVA with Holm-Sidak *post hoc* comparison. \*\*\*\*,  $P \leq$

339 0.0001 **(C)** Schematic summary of the TMT-10-plex experiment (set 2) and workflow used to quantify the  
340 phosphoproteomes of intracellular  $\Delta$ CDPK3 tachyzoites treated with 50  $\mu$ M BIPPO (15s), 8  $\mu$ M A23187  
341 (50s), and WT parasites treated with 50  $\mu$ M BIPPO (15s). **(D)** Overlap between differentially regulated  
342 phosphosites that display CDPK3 dependency following treatment with 50  $\mu$ M BIPPO (15s) or 8  $\mu$ M A23187  
343 (50s) (data derived from set 1 and 2). Red and blue arrows represent up- and down-regulated sites,  
344 respectively. Only phosphosites found to be differentially regulated upon treatment with both A23187 and  
345 BIPPO were included for analysis.

346

### 347 **A sub-minute timecourse of CDPK3 dependent and independent signalling** 348 **progression in ionophore-induced egress.**

349 The experiments delineated above, exploring the phosphosignalling networks in WT and  
350  $\Delta$ CDPK3 parasites triggered upon treatment with A23187 or BIPPO, examined only a  
351 single treatment timepoint. These experiments therefore offer only a limited 'signalling  
352 snapshot' that precludes any insights into the dynamics of signalling progression over  
353 time. To further investigate the putative activation of cNMP-induced signalling pathways  
354 in WT and  $\Delta$ CDPK3 mutants upon A23187 treatment we performed a sub-minute  
355 phosphosignalling timecourse. We treated intracellular WT and  $\Delta$ CDPK3 tachyzoites with  
356 8  $\mu$ M A23187 for 15, 30 or 60 seconds at 37°C (Fig. 3A), during which the parasites  
357 remained intracellular. As before, samples were subjected to TMT-based quantitative  
358 analysis of phosphoproteomic changes. Fold changes were calculated relative to a 0s  
359 (DMSO) control. In total we quantified 11,021 phosphorylation sites (Data S3).

360 DR thresholds were set at 3x MAD of the log<sub>2</sub>FC across each WT timepoint (15s, 30s  
361 and 60s). Phosphorylation sites were considered differentially regulated if at any given  
362 timepoint their log<sub>2</sub>FC surpassed these thresholds. CDPK3 dependency was determined  
363 for each phosphorylation site by calculating the log<sub>2</sub> ratios of A23187-treated WT and  
364  $\Delta$ CDPK3 parasites for each timepoint. The resulting ratios were used to calculate the  
365 MAD at each timepoint, and the most stringent score was used to set 3X MAD outlier  
366 thresholds. A DR site was considered CDPK3-dependent if, at any given timepoint, it  
367 simultaneously passed the DR and CDPK3 dependency thresholds.

368 We identified 2,408 phosphorylation sites (DR<sup>UP</sup>) upon A23187 treatment in WT  
369 parasites, which were also quantified in  $\Delta$ CDPK3 parasites (Data S3). To examine  
370 whether this dataset recapitulates our previous findings, we compared the DR<sup>UP</sup> sites

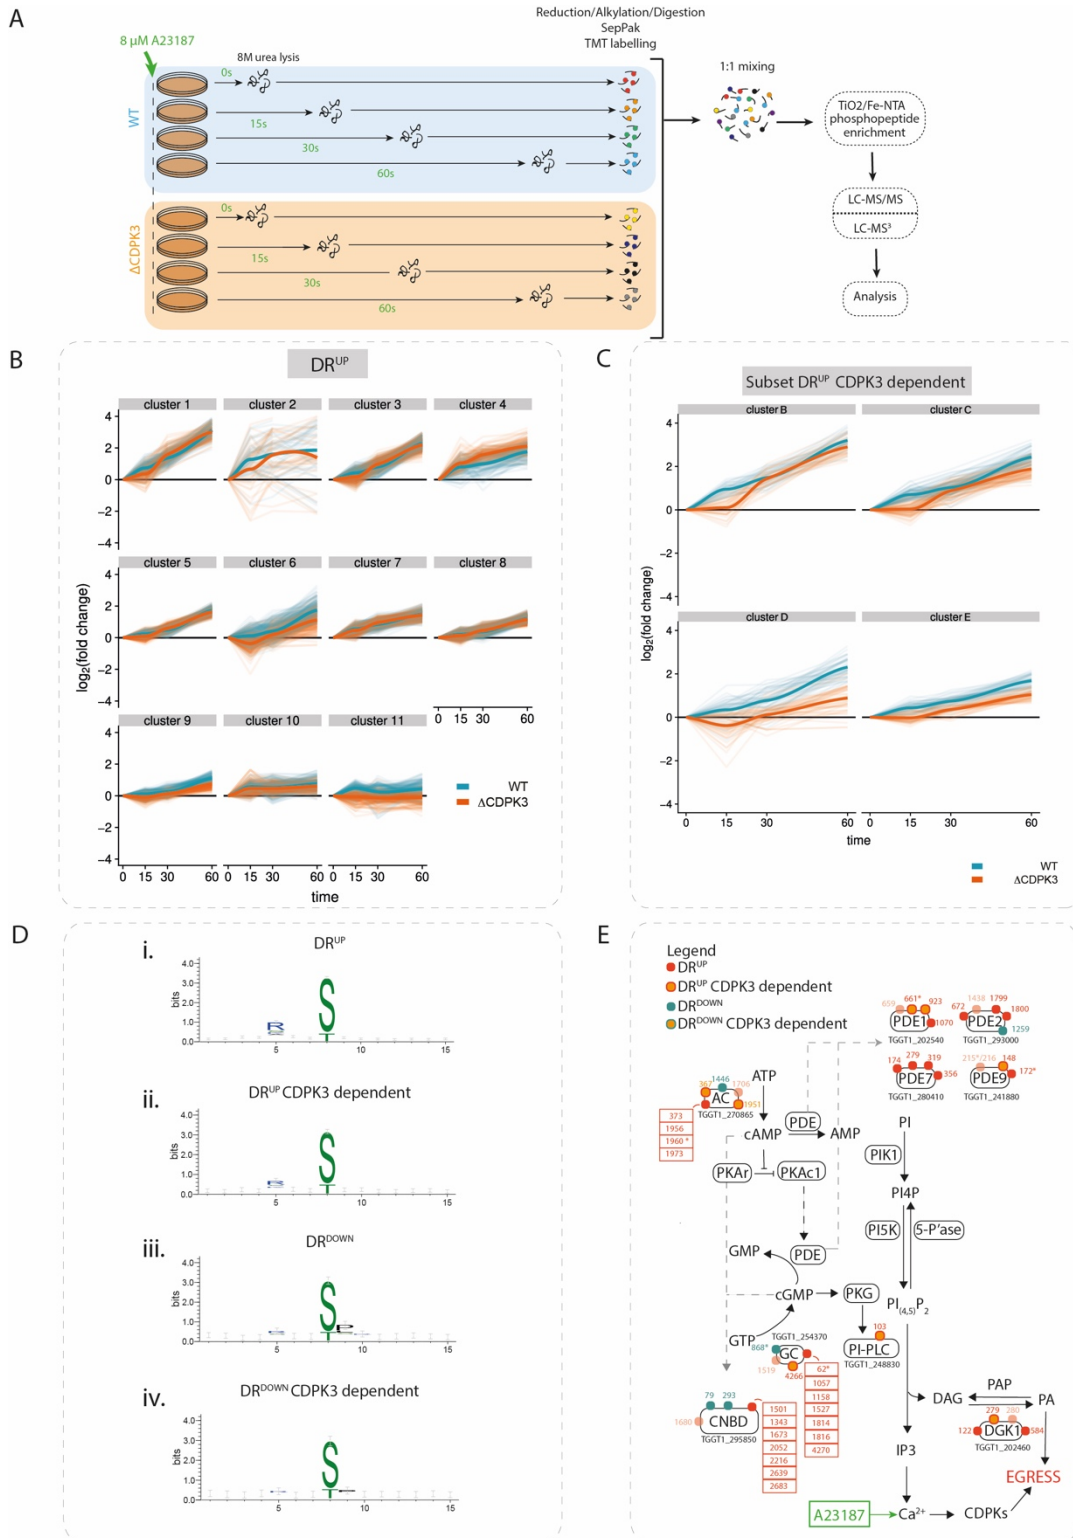

371 **Figure 3. A23187 treatment results in partially CDPK3-dependent phosphorylation of targets**  
 372 **implicated in PKG signalling (A) Schematic of A23187-treatment timecourse experimental design. (B)**  
 373 **Gaussian mixture-model-based clustering of all DR<sup>UP</sup> sites in the A23187-treatment time courses. Log<sub>2</sub>FC**

374 values from both WT and  $\Delta$ CDPK3 samples were combined to cluster on six dimensions (WT 15s, 30s and  
375 60s and  $\Delta$ CDPK3 15s, 30s and 60s). Thin lines represent the time course traces of individual  
376 phosphorylation sites. Thick lines represent Loess regression fits of all traces. **(C)** Gaussian mixture-model-  
377 based clustering of a subset of DR<sup>UP</sup> CDPK3-dependent sites in the A23187-treatment time courses.  
378 Log<sub>2</sub>FC values from both WT and  $\Delta$ CDPK3 samples were combined to cluster on six dimensions (WT 15s,  
379 30s and 60s and  $\Delta$ CDPK3 15s, 30s and 60s). Thin lines represent the time course traces of individual  
380 phosphorylation sites. Thick lines represent Loess regression fits of all traces. Four clusters (B-E) best  
381 illustrating the transient phosphorylation delay in  $\Delta$ CDPK3 parasites are shown. **(D)** Results of  
382 phosphorylation motif enrichment analysis using rmotifx 1.0. Results are shown for the analysis of **(i)** DR<sup>UP</sup>  
383 **(ii)** DR<sup>UP</sup> CDPK3-dependent **(iii)**DR<sup>DOWN</sup> and **(iv)** DR<sup>DOWN</sup> CDPK3-dependent phosphorylation sites. **(E)**  
384 Differentially A23187-regulated phosphosites detected on targets implicated in the regulation of PKG  
385 signalling. Red and blue dots represent sites that are differentially up- or down-regulated, respectively. Dots  
386 with an orange centre indicate CDPK3-dependent sites. Numbers refer to site position within protein. Dots  
387 with reduced opacity represent sites with a localisation score difference < 10. Asterisks highlight sites that  
388 were previously detected in this study's A23187/BIPPO phosphoproteome experiment (see Fig. 1D & Fig.  
389 2C).

390

391 identified at the 60s timepoint in this experiment, with those identified after 50s A23187  
392 treatment from the preceding experiments (Fig. 2C). Of the 572 DR phosphorylation sites  
393 identified 50s after A23187 treatment in our initial experiment, 503 sites (~88%) also  
394 passed the threshold for differential (up)regulation in the timecourse at the 60s post-  
395 treatment timepoint. Reassuringly, we observed many proteins previously identified as  
396 being phosphorylated in a CDPK3-dependent manner (Treeck *et al.*, 2014; Wallbank *et*  
397 *al.*, 2019), including the CRAL/TRIO domain containing protein (TGGT1\_254390), a  
398 putative P-type ATPase4 (TGGT1\_278660), CDPK2A (TGGT1\_206590) and the tyrosine  
399 transporter ApiAT5-3 (TGGT1\_257530).

400 To get an overview of the progression of signalling cascades in DMSO- and A23187-  
401 treated parasites, we performed a clustering analysis, as previously described (Invergo  
402 *et al.*, 2017), of DR phosphorylation sites identified in WT and, separately, of DR sites  
403 found to be CDPK3-dependent in our timecourse experiments (see Table S1 for all  
404 clusters). We obtained 11 clusters showing distinct up-regulation dynamics (Fig. 3B) and  
405 10 clusters showing down-regulation dynamics in WT parasites (Supp Fig. 5A). Analysis  
406 of CDPK3-dependent DR sites, meanwhile, yielded 10 up-regulated clusters and 6 down-  
407 regulated clusters Fig. 3C), (Supp Fig. 5B-C).

408 In the up-regulated clusters, we identified a preponderance for phosphorylation motifs  
409 with arginine in the -3 position (Fig. 3Di), a consensus sequence that has previously been  
410 shown to be preferentially phosphorylated by CDPK1 (Lourido *et al.*, 2013) and possibly  
411 CDPK3 (Treeck *et al.*, 2014). Reassuringly, this consensus motif was also observed  
412 among DR<sup>UP</sup> CDPK3-dependent sites (Fig. 3Dii). Down-regulated phosphorylated sites,  
413 meanwhile, show a clear enrichment for proline in the +1 position (Fig. 3Diii & Fig. 3Div).  
414 This indicates that while CDPK activity (and/or activity of kinases with a similar substrate  
415 preference) is being induced by calcium-signalling, a distinct set of one or more kinases  
416 with this phosphorylation motif preference is being inactivated concurrently. Alternatively,  
417 this could be mediated by the activation of a specific phosphatase. We observed that  
418 several of the less phosphorylated proteins in the timecourse are secreted into the  
419 parasitophorous vacuole (PV), which physically separates the parasite from the host cell  
420 cytoplasm. Several proteins that are secreted into the PV have been shown to play a role  
421 in mediating egress. This includes GRA41, which has been shown to be important for  
422 A23187-induced egress (LaFavers *et al.*, 2017). It is therefore possible that the secreted  
423 proteins identified in our timecourse may be implicated in wider signalling events  
424 occurring in the PV that are required for egress.

425 Several functionally related proteins were phosphorylated with similar dynamics, as  
426 revealed by Gene Ontology (GO) term enrichment (see Tables S2-5 for DR<sup>UP</sup>, DR<sup>DOWN</sup>,  
427 CDPK3-dependent DR<sup>UP</sup> and CDPK3-dependent DR<sup>DOWN</sup> GO term enrichments,  
428 respectively). Most notably, two up-regulation clusters (clusters 1 and 2) were enriched  
429 in terms related to signal transduction (GO:0007165, GO:0007154, GO:0023052) and  
430 hydrolase activity (GO:0016787, GO:0042578, GO:0016462, GO:0016817, GO:0016818,  
431 GO:0017111), respectively (Fig. 3B). These enrichments were, in part, driven by  
432 phosphorylation of PDEs and cyclases involved in cyclic nucleotide signalling. Thus, not  
433 only are the enzymes potentially upstream of PKG being phosphorylated upon exposure  
434 to ionophore, but also the dynamics of phosphorylation are similar between them.

435 We also found significant enrichment of membrane proteins in CDPK3-dependent  
436 clusters (GO:0044425, GO:0016021, GO:0031224, GO:0016020). These are predicted  
437 to play roles in nutrient transport and ion-exchange, including the sodium-hydrogen  
438 exchangers NHE1 and NHE3 (which have previously been linked to egress) (Arrizabalaga  
439 *et al.*, 2004; Francia *et al.*, 2005), and the tyrosine transporter ApiAT-5-3 (a known target  
440 of CDPK3 phosphorylation)(Treeck *et al.*, 2014; Wallbank *et al.*, 2019).



441 Further GO enrichment analysis of up-regulated clusters revealed other potential  
442 downstream targets of ionophore-induced signalling, including transcription (e.g.  
443 GO:0006355, GO:1903506, GO:2001141) by AP2-family transcription factors,  
444 magnesium chelatase activity (GO:0016851) by DNA replication licensing factors, and  
445 regulation of a GTPase-mediated process (GO:00423087, GO:0051336). Intriguingly, we  
446 found that phosphorylation of several targets associated with these GO terms also  
447 showed CDPK3 dependency, including AP2VIII-2 (TGGT1\_233120), AP2XI-2  
448 (TGGT1\_310900), MCM7 (TGGT1\_237220), and a predicted GTPase, Ras-related  
449 Rab11 (TGGT1\_289680). The function of these proteins in the CDPK3 signalling cascade  
450 is less clear but may point towards biological processes related to DNA replication and  
451 transcription.

452 In addition to its likely involvement in the numerous signalling processes mentioned  
453 above, CDPK3 also directly or indirectly regulates the activities of other signalling  
454 proteins. For example, CDPK3-dependent down-regulation was detected at a site within  
455 the protein kinase domain of the cell-cycle-associated protein kinase GSK  
456 (TGGT1\_265330 S214). Similarly, CDPK3-dependent DR<sup>UP</sup> sites were found within the  
457 PI3Ka domain of PI3/4-kinase (TGGT1\_215700) and the EF-hand domains of centrin 2  
458 (TGGT1\_250340) and calmodulin (TGGT1\_305050).

459 It is important to note that visualisation of the CDPK3-dependent DR<sup>UP</sup> clusters revealed  
460 that for many sites, the effect of CDPK3 deletion was temporary, such that there was an  
461 initial delay in phosphorylation, but by 60s the sites reached only slightly lower log<sub>2</sub>FC  
462 values than in WT (Fig. 3C). This may point to the redundant or compensatory activity of  
463 a protein kinase other than PKG, which could in part account for the fact that egress still  
464 occurs in CDPK3-depleted parasites, albeit at a delayed pace. Such a delay was not  
465 clearly detectable in the CDPK3-dependent DR<sup>DOWN</sup> clusters.

466 The GO terms “signal transduction” and “hydrolase activity” mentioned above contained  
467 numerous phosphorylation sites on proteins potentially involved in cNMP signalling,  
468 including the PDEs TGGT1\_202540 (PDE1) and TGGT1\_241880 (PDE9), the adenylate  
469 cyclase TGGT1\_270865, the guanylyl cyclase TGGT1\_254370, and the CNBD  
470 containing protein TGGT1\_295850 (Fig. 3E; Data S3). In addition to these previously  
471 detected targets, we also observed increased phosphorylation of PDEs TGGT1\_280410  
472 (PDE7) and TGGT1\_293000 (PDE2) as well as components of phosphoinositide

473 signalling including the PI-PLC TGGT1\_248830 and the DAG kinase 1 (DGK1)  
474 TGGT1\_202460. Many phosphorylation sites on these enzymes are found to be CDPK3-  
475 dependent (Fig. 3E). PI-PLC is required for the production of IP<sub>3</sub> which triggers calcium  
476 release and has been implicated as a key downstream mediator of PKG activity (Brochet  
477 *et al.*, 2014), while the DGK1 has been shown to play an important role in the conversion  
478 of intracellular DAG to PA and, by extension, the activation of microneme secretion and  
479 subsequent egress (Bullen *et al.*, 2016). Collectively, these findings further substantiate  
480 our hypothesis that the A23187-mediated release of Ca<sup>2+</sup> activates a CDPK3-dependent  
481 feedback loop that regulates the PKG signalling pathway.

### 482 **Deletion of CDPK3 leads to disruptions in cAMP levels and lipid signalling** 483 **following A23187 treatment.**

484 While it is uncertain whether the above-mentioned phosphorylation events modulate the  
485 function of the proteins that they are found on, the putative CDPK3-dependent regulation  
486 of cNMP signalling is intriguing, as altered hydrolysis of either cAMP or cGMP has defined  
487 regulatory consequences for PKG activation. Similarly, both PI-PLC and the DAG kinase  
488 are understood to be key players in the PKG signalling pathway leading to egress  
489 (Brochet *et al.*, 2014; Bullen *et al.*, 2016). We therefore set out to determine whether  
490 deletion of CDPK3 would lead to disruptions in these signalling pathways.

491 To test whether levels of DAG and global lipid production are dysregulated following  
492 disruption of CDPK3, we performed kinetics experiments in which we analysed DAG and  
493 phospholipid levels in WT and  $\Delta$ CDPK3 parasites before and after stimulus with the  
494 calcium ionophore A23187, in a similar manner to the previous phosphoproteomic  
495 timecourse. Extracellular WT and  $\Delta$ CDPK3 parasites were shifted to 37°C for 60 seconds  
496 to acclimatise, and then stimulated by addition of media containing A23187 similar to  
497 established methods (Katris *et al.*, 2020). The parasites were incubated for 5, 10, 30, 45  
498 or 60 seconds before quenching to stop the signal chain, followed by lipid analysis. A 0s  
499 (DMSO) control was also included. After 60 seconds of A23187 stimulus, WT parasites  
500 produced slightly more DAG than  $\Delta$ CDPK3 parasites, however there was no difference  
501 with the DMSO control (Fig. 4A, Supp Fig. 6A). Accordingly, WT parasites began to show  
502 less phospholipids than  $\Delta$ CDPK3 parasites after 45 seconds of stimulus (Fig. 4A, Supp  
503 Fig. 6B), consistent with a lack of turnover of phospholipids to produce DAG in the  
504  $\Delta$ CDPK3 knockout parasites. While DAG-related proteins were the primary lipid related

505 proteins affected in  $\Delta$ CDPK3 based on our timecourse phosphoproteome, we also  
506 identified other proteins involved in palmitoylation and triacylglycerol synthesis that were  
507 differentially regulated, so we further investigated other lipids including Free Fatty Acids  
508 (FFAs) and triacylglycerols (TAGs). We observed a trend towards an increase in the  
509 levels of free fatty acids (FFAs) in WT parasites following A23187 stimulus (Fig. 4B, Supp  
510 Fig. 6C), which remained unchanged in  $\Delta$ CDPK3 parasites. This was accompanied by a  
511 concomitant change in triacylglycerols (TAGs) whereby prior to stimulus,  $\Delta$ CDPK3  
512 parasites had more TAGs than WT parasites, but after A23187 stimulus, WT tachyzoites  
513 produced more TAGs over time so that levels became similar between both parasite lines  
514 (Fig. 4C, Supp Fig. 6D). This shows that following A23187 treatment,  $\Delta$ CDPK3 parasites  
515 have altered FFA and TAG abundance necessary for lipid recycling and storage,  
516 consistent with a speculated role for CDPK3 in metabolic regulation (Treeck *et al.*, 2014).  
517 A full lipidomic analysis of individual phospholipid species including  
518 lysophosphatidylinositol (LPI), lysophosphatidylcholine (LPC) phosphatidylinositol (PI),  
519 phosphatidylserine (PS), phosphatidylthreonine (PT) phosphatidic acid (PA),  
520 phosphatidylethanolamine (PE), FFAs, sphingomyelin (SM) and phosphatidylcholine  
521 (PC) found no significant difference in any phospholipids between WT and  $\Delta$ CDPK3  
522 parasites under normal cell culture conditions (Supp Fig. 6E), showing that defects in lipid  
523 signalling in  $\Delta$ CDPK3 parasites can only be seen following A23187 calcium stimulus.

524 Having identified several cNMP-related proteins that were differentially phosphorylated in  
525  $\Delta$ CDPK3 parasites in our phosphoproteome timecourse, we next wanted to determine  
526 whether there are any perturbations to cNMP signalling upon deletion of CDPK3 by  
527 measuring the changes in intracellular levels of cAMP and cGMP. To do this WT and  
528  $\Delta$ CDPK3 extracellular parasites that were syringe lysed in BSA free Endo buffer (Endo *et al.*,  
529 1987) were treated with vehicle (DMSO), 50  $\mu$ M BIPPO for 5 or 15 seconds or 8  $\mu$ M  
530 A23187 for 5, 15, 30 or 60 seconds at 37°C. We found that basal levels of cGMP were  
531 identical in WT and  $\Delta$ CDPK3 parasites and treatment with the PDE inhibitor BIPPO  
532 resulted in elevated cGMP levels in both parasite lines compared to baseline (Fig. 4D).  
533 In contrast, and somewhat surprisingly, we found no changes in cGMP levels following  
534 A23187 treatment over the course of 60 seconds. It is important to note that our  
535 measurements of cGMP levels following treatment with A23187 differ from results shown  
536 in Stewart *et al.* (2017). One key difference is that we kept tachyzoites in Endo buffer, a  
537 potassium-rich buffer which mimics the intracellular environment. Stewart *et al.* used

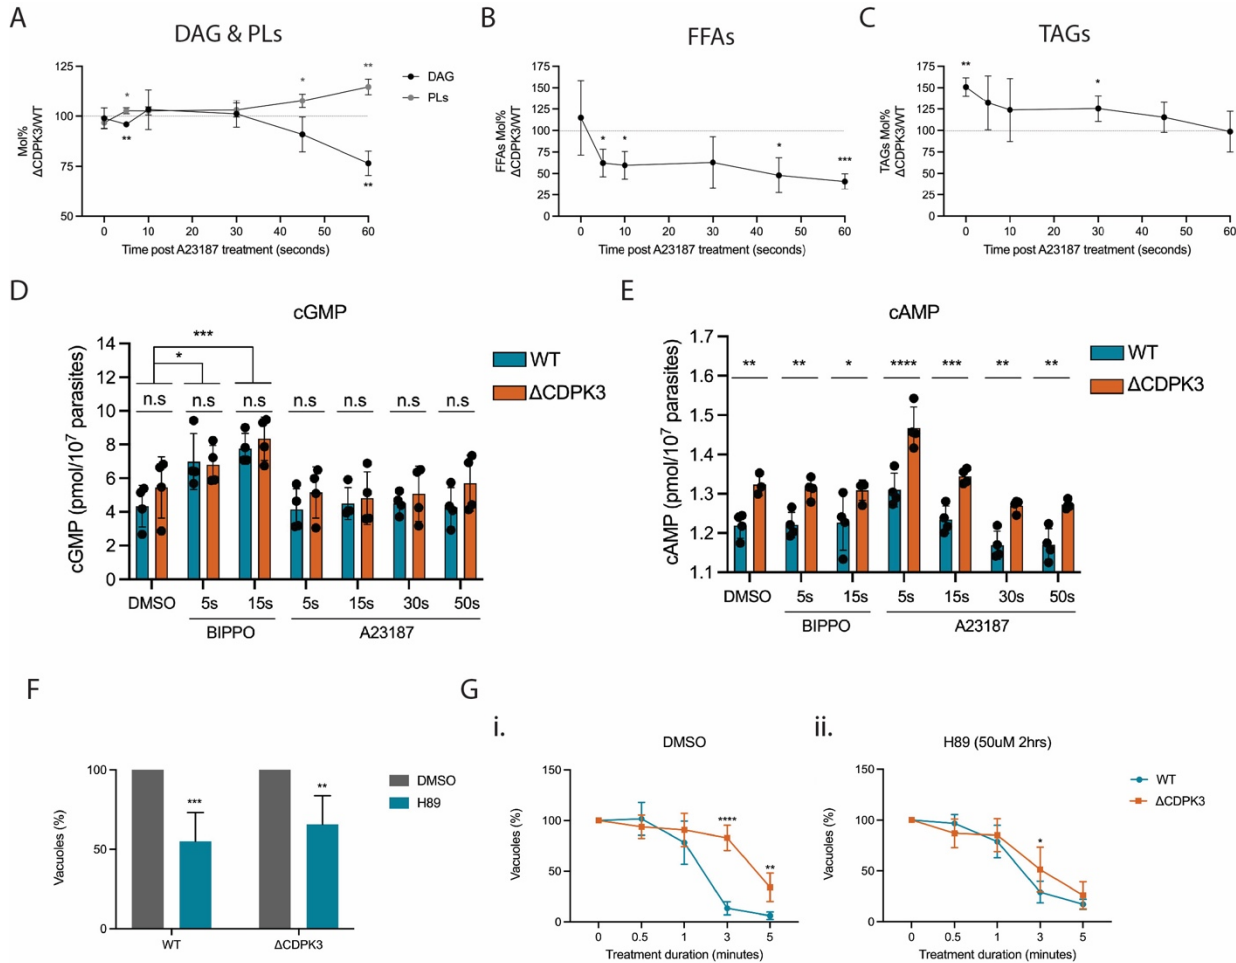

538 **Figure 4. Disruption of CDPK3 leads to perturbations in lipid and cAMP signalling following A23187**  
 539 **treatment** Pulse experiment of WT and  $\Delta$ CDPK3 parasites treated with DMSO or 8  $\mu$ M A23187 for 0, 5,  
 540 10, 30, 45 or 60 seconds analysing levels of **(A)** DAG and PLs **(B)** FFAs and **(C)** TAGs, with data expressed  
 541 as a ratio of  $\Delta$ CDPK3/WT levels. Data are represented as mean  $\pm$  s.d. (n=4). Significance was assessed  
 542 using a one same t and Wilcoxon test. \*\*,  $P \leq 0.01$ ; \*,  $P \leq 0.05$ . **(D)** Comparison of intracellular cGMP and  
 543 **(E)** cAMP levels in WT and  $\Delta$ CDPK3 tachyzoites following treatment with DMSO for 60 seconds; BIPPO  
 544 for 5 or 15 seconds; or A23187 for 5, 15, 30 or 60 seconds. All samples were lysed in 0.1 M HCl to inactivate  
 545 all PDEs, and extracts were analyzed by using commercial ELISA-based cGMP and cAMP detection  
 546 assays. Data are represented as mean  $\pm$  s.d. (n=4). Two-way ANOVA with Sidak multiple comparisons.  
 547 \*\*\*\*,  $P \leq 0.0001$ ; \*\*\*,  $P \leq 0.001$ ; \*\*,  $P \leq 0.01$ ; \*,  $P \leq 0.05$ ; n.s, not significant. **(F)** Quantification of natural  
 548 egress of WT and  $\Delta$ CDPK3 parasites following treatment with DMSO or 50  $\mu$ M H89 (2 hrs). Graph shows  
 549 the remaining % of un-egressed vacuoles (relative to untreated). Data are represented as mean  $\pm$  s.d.  
 550 (n=5). Significance was assessed using an unpaired two-tailed t-test. \*\*\*,  $P \leq 0.001$ ; \*\*,  $P \leq 0.01$  **(G)** Egress  
 551 assay of **(i)** DMSO- and **(ii)** H89-pre-treated WT and  $\Delta$ CDPK3 parasites following treatment with 8  $\mu$ M  
 552 A23187. Data are represented as mean  $\pm$  s.d. (n=5). Two-way ANOVA with Holm-Sidak *post hoc*  
 553 comparison. \*\*\*\*,  $P \leq 0.0001$ ; \*\*,  $P \leq 0.01$ .

554 extracellular parasites in low potassium buffer, which may have profound effects on  
555 downstream signalling pathways, given that those parasites have received signals that  
556 they are outside of the host cell. Indeed, McCoy et al have shown that the A23187-  
557 mediated egress defect of  $\Delta$ CDPK3 parasites can be rescued if saponin permeabilised  
558 infected host cells are incubated in extracellular buffer, but not when incubated in  
559 intracellular buffer (McCoy *et al.*, 2012), suggesting that there are key signalling  
560 differences between intra and extracellular parasites.

561 Basal cAMP levels, by contrast, were 8.3% higher in knockout parasites compared to WT.  
562 Following treatment with A23187, we found that cAMP levels initially rose in both WT and  
563 knockout parasites at 5 seconds post treatment, with a gradual decrease to below basal  
564 levels at 60 seconds post treatment (Fig. 4E). We observed no immediate change in  
565 cAMP levels following BIPPO treatment, suggesting that BIPPO does not inhibit cAMP-  
566 specific PDEs in *T. gondii*. These findings point towards perturbations in cAMP signalling  
567 in  $\Delta$ CDPK3 parasites which have elevated basal levels that further increase upon A23187  
568 treatment.

569 Since basal cAMP levels are elevated in  $\Delta$ CDPK3 parasites compared to WT, we  
570 reasoned that inhibition of cAMP signalling would overcome the A23187-mediated egress  
571 delay observed in knockout parasites. To test this, we treated both WT and  $\Delta$ CDPK3  
572 parasites with the ATP-competitive PKAc inhibitor H89 (50  $\mu$ M). After 2 hours of  
573 treatment, there was a significant amount of premature egress in both WT and  $\Delta$ CDPK3  
574 parasites (~45% & ~34%, respectively; Fig. 4F) consistent with previous reports that have  
575 shown that the downregulation of cAMP signalling by genetic disruption of PKAc1  
576 stimulates premature egress in *Toxoplasma* (Jia *et al.*, 2017; Uboldi *et al.*, 2018).  
577 Intriguingly, when we investigated A23187-induced egress rates of the remaining  
578 intracellular H89 pre-treated parasites, we found that the egress delay normally observed  
579 in  $\Delta$ CDPK3 parasites was largely rescued with H89 pre-treatment (Fig. 4Gi-ii). This finding  
580 suggests that pharmacological inhibition of cAMP signalling is sufficient to partially  
581 compensate for the deletion of CDPK3.

582

583

584

## 585 **Cell biological and biochemical characterisation of PDE1, 2, 7 and 9.**

586 The preponderance of A23187-induced phosphorylation on several PDEs suggests that  
587 they may play an important role in the cAMP- and cGMP-mediated signalling cascades  
588 that lead to egress assuming that phosphorylation may directly, or indirectly control their  
589 activity. Specifically, we predicted a cAMP-specific PDE would play an important role  
590 given the rescue of the egress defect observed in  $\Delta$ CDPK3 parasites by the PKA inhibitor  
591 H89. As the specificity for the majority of *Toxoplasma* PDEs has not been experimentally  
592 validated, we generated HA-tagged conditional knockouts (cKOs) of the 4 PDEs identified  
593 as being phosphorylated following A23187 treatment in order to characterise them and  
594 identify which are capable of hydrolysing cAMP (Fig. 5A). For each line, integration of  
595 both repair templates was validated by PCR (Supp Fig. 7). Western blot analysis  
596 confirmed that they migrate at their predicted sizes (Fig. 5B), and we found that each PDE  
597 occupies a distinct cellular localisation (Fig. 5C), in agreement with a previous report (Vo  
598 *et al.*, 2020; Moss *et al.*, 2021). To identify the substrate specificity of the PDEs, we  
599 immunoprecipitated each via the HA-tag from parasite lysates and measured their  
600 hydrolytic activity *in vitro*. We included the *P. falciparum* PDE $\beta$  that was previously shown  
601 to be dual-specific as a positive control (Flueck *et al.*, 2019). PDEs 1, 7 and 9 were able  
602 to hydrolyse cGMP, while PDE2 is specific for cAMP (Fig. 5D). Only PfPDE $\beta$  displayed  
603 dual-hydrolytic activity in our hands.

604 To further confirm the hydrolytic specificity of the PDEs, we treated each of the samples  
605 with BIPPO. While the specificity of BIPPO has not been experimentally validated in  
606 *Toxoplasma*, cGMP-specific PDE1 and 7 were significantly inhibited by BIPPO, while the  
607 cAMP-specific PDE2 was refractory to BIPPO inhibition (Fig. 5E). Interestingly, PDE9, a  
608 cGMP-specific PDE appears less sensitive to BIPPO treatment. This is in agreement with  
609 a previous study (Vo *et al.*, 2020), although in our hands PDE9 is cGMP-specific and not  
610 dual-specific. Collectively these data show that BIPPO is a cGMP-specific inhibitor in  
611 *Toxoplasma* and lends further support that PDE2 is a cAMP-specific PDE. Interestingly,  
612 we found that both the cAMP- and cGMP-hydrolysis activities of PfPDE $\beta$  are inhibited  
613 with BIPPO. It will be interesting in the future to evaluate the structural differences  
614 between the PDEs and the inhibitory potential of BIPPO.

615

616

A

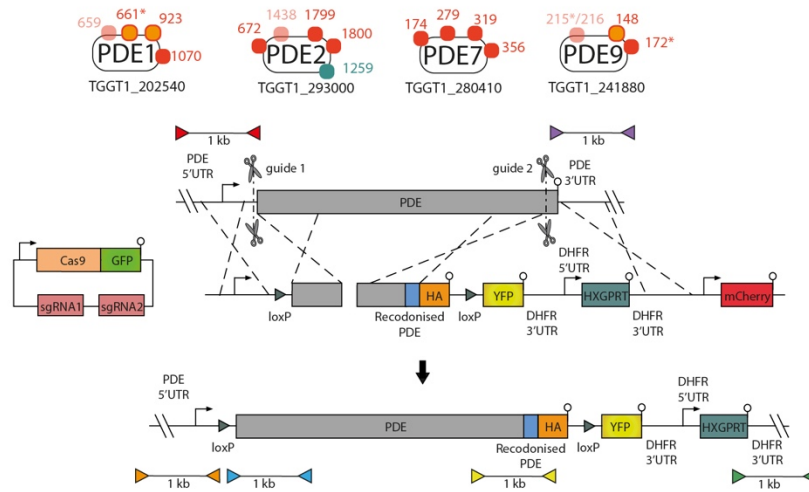

B

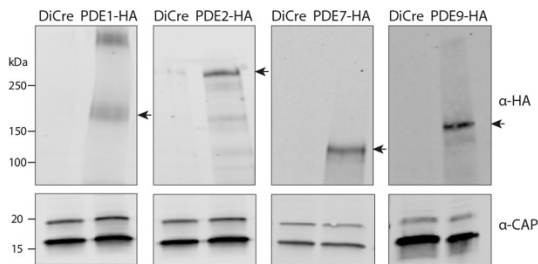

C

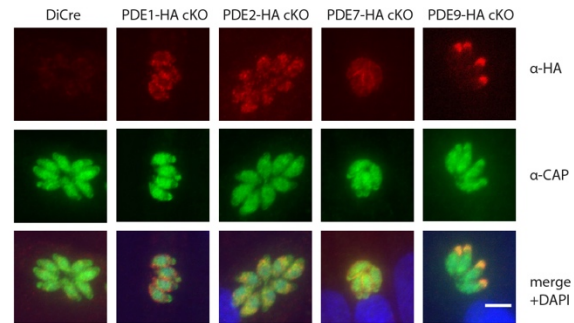

D

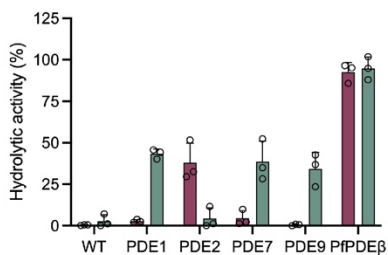

E

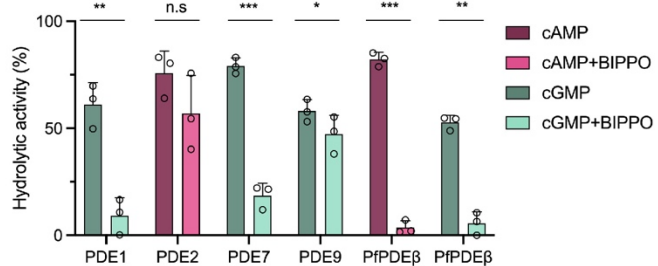

617 **Figure 5. Candidate PDEs occupy distinct cellular localisations and are differentially inhibited by**  
 618 **BIPPO (A)** Schematic representation of the PDEs identified in the timecourse phosphoproteome (see Fig.  
 619 2E) and the strategy use to generate the conditional PDE knockout lines. CRISPR/Cas9 was used to  
 620 generate two cuts in the gene and two separate repair templates were provided to integrate one loxP site  
 621 (green triangle) upstream of the PDE gene, and another repair template to tag the PDE with a C-terminal  
 622 HA epitope tag (orange) and introduce a second loxP site, a YFP sequence and the HXGPRT cassette.  
 623 Scissors represent Cas9 cleavage sites and lollipops depict stop codons. Coloured triangles represent  
 624 primer pairs used to detect WT, 5' integration and 3' integration loci for 5' loxP integration (red, orange and  
 625 blue respectively) and 3' tagging (purple, yellow and green respectively). PCR results using these primer

626 pairs are shown in Supp Fig. 7. **(B)** Western blot analysis of parental DiCre and HA-tagged PDE1, PDE2,  
627 PDE7 and PDE9 cKO parasites probed with  $\alpha$ -HA antibodies showing migration of the PDEs at their  
628 expected molecular weights as depicted by arrows. A non-specific band >250 kDa is observed in the PDE1-  
629 HA cKO line. Blots were probed with  $\alpha$ -CAP antibodies as a loading control. **(C)** Immunofluorescence  
630 analysis of DiCre and HA-tagged PDE1, PDE2, PDE7 and PDE9 cKO lines probing with  $\alpha$ -HA (red) and  $\alpha$ -  
631 CAP (green) antibodies. Scale bar, 5  $\mu$ m. **(D)** Hydrolytic activity of immunoprecipitated HA-tagged PDE1,  
632 PDE2, PDE7, PDE9 and the PfPDE $\beta$  using either cAMP or cGMP as a substrate. Lysates from the WT  
633 parental line were also included as a control. Data are represented as mean  $\pm$  s.d. (n=3). **(E)** Hydrolytic  
634 activity of immunoprecipitated HA-tagged PDE1, PDE2, PDE7, PDE9 and PfPDE $\beta$  after incubating with  
635 DMSO (vehicle) or 25  $\mu$ M BIPPO. cAMP was used as a substrate for PDE2 and PDE $\beta$ , while cGMP was  
636 used as a substrate for PDE1, PDE7, PDE9 and PDE $\beta$ . Data are represented as mean  $\pm$  s.d. (n=3).  
637 Significance was assessed using a paired t-test. \*\*\*,  $P \leq 0.001$ ; \*\*,  $P \leq 0.01$ ; \*,  $P \leq 0.05$ ; n.s. not significant.

638

639 **Functional assessment of the candidate PDEs reveals that PDEs 1 & 2 are**  
640 **important but not essential during the lytic cycle while PDEs 7 & 9 are dispensable.**

641 We next wanted to establish which of the aforementioned PDEs were essential for lytic  
642 growth. Addition of rapamycin (RAP) to the HA-tagged PDE cKO lines leads to excision  
643 of the PDE gene of interest in the respective cKO lines (Fig. 6A). Despite near complete  
644 excision in all lines as observed by PCR 24 hours post RAP treatment (Fig. 6B), it was  
645 only until 3 days post-treatment that we saw complete protein depletion below detectable  
646 levels (Fig. 6C-D). Therefore, all subsequent experiments were conducted with parasites  
647 3 days post RAP treatment. To assess the impact of PDE disruption on parasite viability  
648 and growth, we performed plaque assays using DMSO- and RAP-treated PDE cKO  
649 parasites and measured the size and number of plaques after 5 days (Fig. 6E-G). All  
650 knockout lines were able to form plaques, with deletion of PDE7 and PDE9 resulting in  
651 no significant changes in plaque size or number. However, PDE1 and PDE2 formed much  
652 smaller plaques, with a 37% and 81% reduction in plaque sizes respectively. Despite a  
653 marked reduction in plaque size for PDE2 knockout parasites, there was no significant  
654 change in the number of plaques compared to the DMSO-treated line. Deletion of PDE1  
655 on the other hand resulted in a 4-fold reduction in the number of plaques formed. Overall,  
656 these results suggest that both PDE1 & PDE2 are important but not essential for lytic  
657 growth and that PDE1 may be important for egress and/or invasion due to the reduced  
658 number of plaques formed following its disruption. Reassuringly, our observed

659



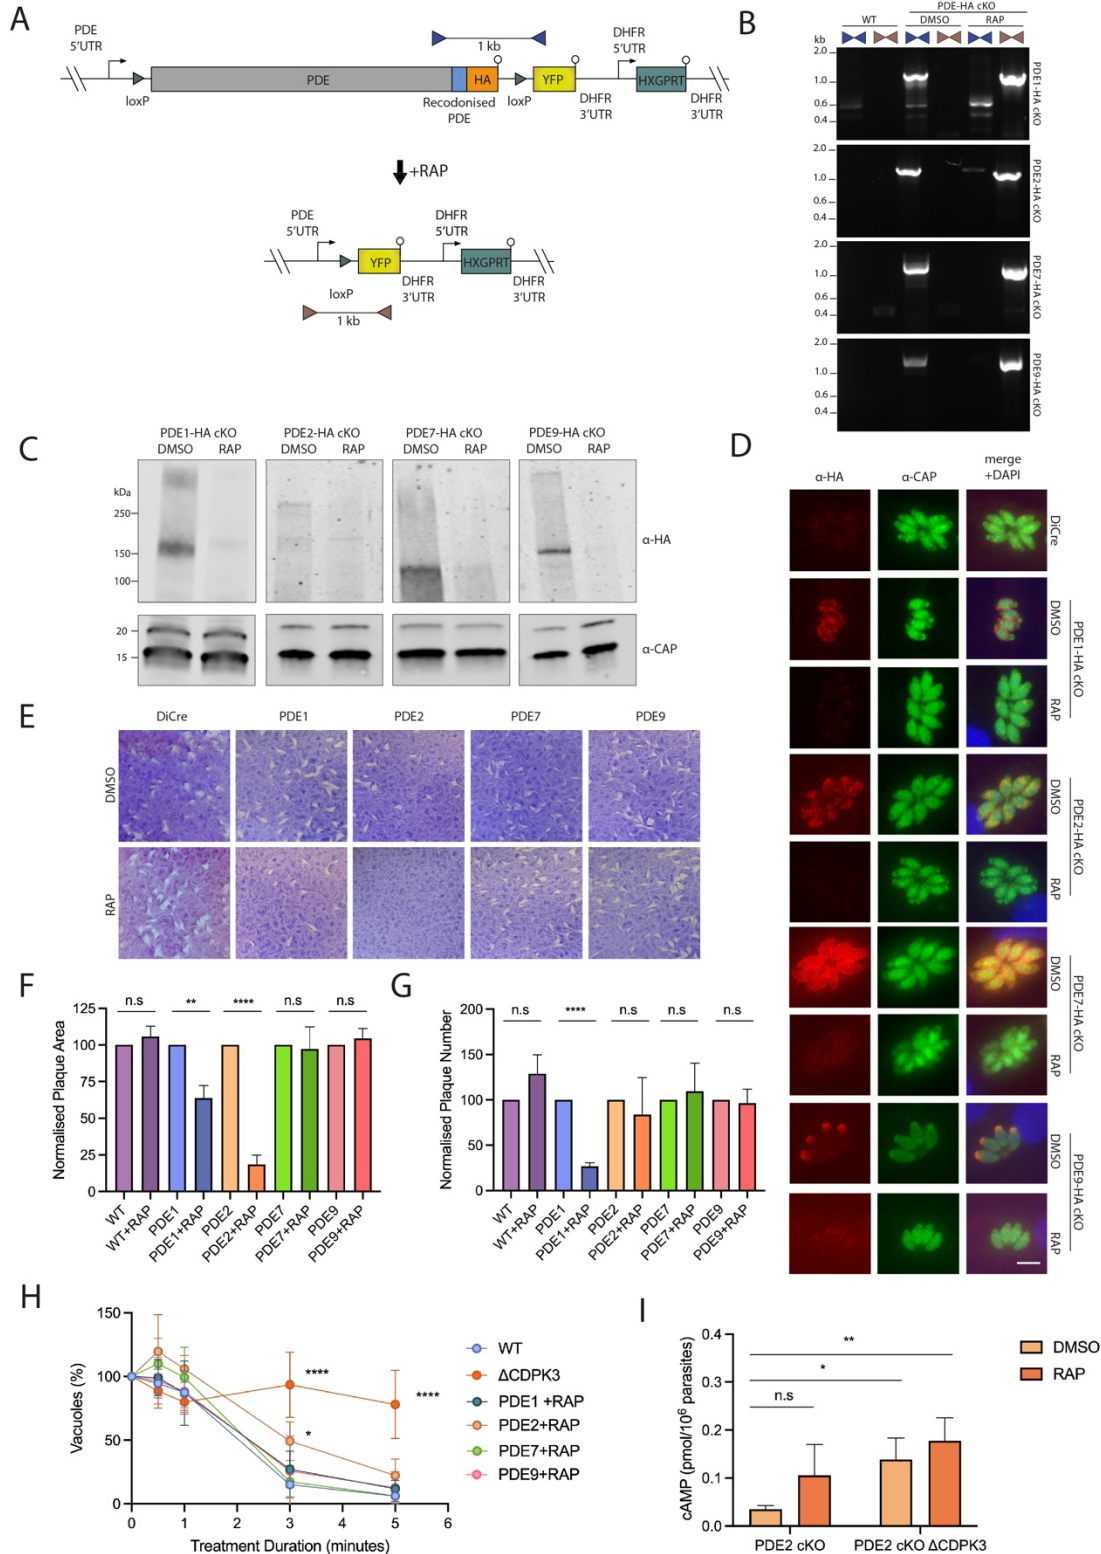

660 **Figure 6. PDE1 and PDE2 are important for lytic growth, with  $\Delta$ PDE2 parasites displaying an A23187-**  
 661 **mediated egress defect similar to  $\Delta$ CDPK3 parasites (A) Schematic representation of PDE2 rapamycin**  
 662 **mediated deletion of PDE cKO lines. Addition of rapamycin leads to excision of the entire gene, placing**

663 YFP under the control of the PDE promoter. Coloured triangles represent primer pairs used to detect  
664 unexcised (blue) and excised (brown) loci. **(B)** PCR analysis of DMSO- and RAP-treated PDE cKO parasite  
665 lines showing near complete excision for all lines. **(C)** Western blot analysis of PDE cKO lines showing near  
666 complete loss of the PDEs at the protein level following treatment with RAP **(E)** Representative images of  
667 plaque assays performed on DMSO- and RAP-treated WT and PDE cKO lines after a period of 5 days.  
668 Assays were performed in biological triplicates. **(F)** Measurement of plaque area shown in Fig. 6E. Data are  
669 represented as mean  $\pm$  s.d. (n=3). Significance was assessed using multiple t-tests. \*\*\*\*,  $P \leq 0.0001$ ; \*\*,  $P$   
670  $\leq 0.01$ ; n.s, not significant. **(G)** Quantification of plaque numbers shown in Fig. 6E. Data are represented  
671 as mean  $\pm$  s.d. (n=3). Significance was assessed using multiple t-tests. \*\*\*\*,  $P \leq 0.0001$ ; n.s, not significant.  
672 **(H)** Egress assay of GFP-T2A-jRCaMP1b expressing WT,  $\Delta$ CDPK3 and RAP-treated PDE cKO parasites  
673 following treatment with 8  $\mu$ M A23187. Data are represented as mean  $\pm$  s.d. (n=3). Two-way ANOVA. \*\*\*\*,  
674  $P \leq 0.0001$ ; \*,  $P \leq 0.05$ . **(I)** Quantification of intracellular cAMP levels of PDE2 cKO and PDE2 cKO  $\Delta$ CDPK3  
675 parasites treated with either DMSO or RAP. Data are represented as mean  $\pm$  s.d. (n=4). Two-way ANOVA  
676 with Turkey's multiple comparisons. \*\*,  $P \leq 0.01$ ; \*,  $P \leq 0.05$ .

677

678 phenotypes for PDE 1, 2, 7 and 9 KOs are in agreement with a recent study which  
679 knocked down all predicted *Toxoplasma* PDEs (Moss *et al.*, 2021).

680

681 We next wanted to determine whether disruption of any of the PDEs would lead to an  
682 A23187-mediated egress delay, similar to  $\Delta$ CDPK3 parasites. We reasoned that if one of  
683 the PDEs is involved in the A23187-mediated feedback loop, then disruption of this PDE  
684 would mimic, at least partially, the A23187-mediated egress delay observed in  $\Delta$ CDPK3  
685 parasites. Using a medium-throughput plate-based egress assay we found that only  
686 deletion of PDE2 showed a modest egress defect (Fig. 6H, Supp Fig. 8). This suggests  
687 an important, but non-essential role for PDE2 in cAMP signalling. Since the egress defect  
688 observed upon deletion of PDE2 did not reach the severity of the egress defect observed  
689 in  $\Delta$ CDPK3 parasites, it is likely that other PDEs, and/or cyclases are involved in the  
690 dysregulation of cAMP levels found in our study, some of which may have been missed  
691 in our phosphoproteome or may not be regulated by phosphorylation. To test this, we  
692 generated a  $\Delta$ CDPK3 KO in the PDE2 cKO line using a similar approach to the one used  
693 in Fig. 2A, however we substituted the HXGPRT cassette with a DHFR-TS selection  
694 cassette. Upon deletion of PDE2, we observed a further increase of cAMP levels  
695 compared to either single gene deletion (Fig. 6I) suggesting that CDPK3 is regulating  
696 another unknown cAMP-specific PDE, or an adenylyl cyclase.

## 697 Discussion

698 In this study we have aimed to unravel the complexity of the signalling pathways that  
699 govern the control of host cell egress of *Toxoplasma* from its host cell. Several signalling  
700 components conserved in higher eukaryotes have previously been identified, and their  
701 connectivity, to some extent described. However, the published data is not currently  
702 supported by a model that fits most experimental results. A deeper understanding of how  
703 the signalling pathways are interconnected is essential for our understanding of the  
704 regulation of host cell egress and of the integration of environmental or endogenous  
705 signals in general. This is important since we do not fully understand how *Toxoplasma*  
706 parasites sense and react to their environment. Furthermore, the plethora of calcium-  
707 dependent kinases and phosphodiesterases imply a highly complex and sensitive  
708 interplay of signalling pathways to finetune cellular responses to inputs. Our results are  
709 likely of importance beyond *Toxoplasma gondii* research: the plant-like calcium-  
710 dependent kinases (CDPKs) are conserved in *Plasmodium* species where it has been  
711 shown that PDE inhibitors can overcome disruption of CDPKs (Absalon *et al.*, 2018).

712 Our data quite clearly support previous data on the importance of cNMP, Ca<sup>2+</sup> and lipid  
713 signalling on parasite exit from the host cell. They furthermore add an important new layer  
714 of information: CDPK3, and potentially other kinases that depend on CDPK3 function, are  
715 part of a feedback loop that enables rapid signalling. This feedback loop does not control  
716 release of Ca<sup>2+</sup> from internal stores, since McCoy *et al* (2012) have shown that disruption  
717 of CDPK3 does not lead to a delay in Ca<sup>2+</sup> release. It also does not appear to act through  
718 elevation of cGMP levels as we show both that treatment with ionophore does not lead to  
719 a measurable increase in cGMP levels and that cGMP levels are not dependent on  
720 CDPK3.

721 More likely, and in keeping with our cAMP measurements, CDPK3 directly or indirectly  
722 downregulates levels of cAMP. This, in turn, alters activity of the cAMP-dependent protein  
723 kinase, PKAc. It is interesting to note that Jia and colleagues found a clear dependency  
724 on PKG for parasites to egress upon PKAc depletion, but they were equally unable to  
725 reliably ascertain cGMP accumulation in intracellular parasites (Jia *et al.*, 2017). While it  
726 is possible that our collective inability to observe elevated cGMP levels is explained by  
727 the sensitivity limits of the assay employed, it is similarly possible that cAMP-mediated  
728 signalling is exerting its effects on the PKG signalling pathway in a cGMP-independent

729 manner. While no such mechanism has been described, it is possible that  
730 phosphorylation of PKG may lead to changes in its affinity for cGMP or it may regulate  
731 the activity of the kinase itself. Further work is needed to clarify the role of cGMP levels  
732 in these conditions. We also identified dysregulation of DAG and phospholipid signalling  
733 in  $\Delta$ CDPK3 parasites following A23187 treatment, which could be contributing to the  
734 delayed egress phenotype observed in the KO parasites. Having identified CDPK3-  
735 dependent phosphorylation sites on both DGK1 and PI-PLC in our timecourse  
736 phosphoproteome, it is possible that these perturbations are being directly mediated by  
737 CDPK3. Alternatively, and as outlined above, any changes in cGMP levels or PKG activity  
738 in  $\Delta$ CDPK3 parasites could also lead to the dysregulation of phospholipid signalling we  
739 observed.

740 We identify PDE2 as one contributor of cAMP control, however, through double gene  
741 deletions of PDE2 and CDPK3, we show that other cAMP signalling components likely  
742 contribute to a further cAMP imbalance. This could be either via as yet unidentified PDEs  
743 with cAMP specificity or, more likely, an adenylate cyclase. In support of the latter, we  
744 identified several CDPK3-dependent phosphorylation sites on an AC $\beta$  following A23187  
745 treatment. We also found that deletion of PDE2 alone leads to a modest egress  
746 phenotype that does not reach  $\Delta$ CDPK3 levels. This is not surprising: our data, and  
747 previous studies have identified many CDPK3-dependent targets (Treeck *et al.*, 2014;  
748 Gaji *et al.*, 2015; McCoy *et al.*, 2017; Wallbank *et al.*, 2019), and the CDPK3-mediated  
749 phenotype is likely caused by a combination of the phosphorylation events identified here.  
750 However, we did not detect any CDPK3-dependent phosphosites on PDE2, so a direct  
751 link between CDPK3 and PDE2 is currently missing. However, it is possible that CDPK3-  
752 dependent phosphorylation sites on PDE2 were not detected in our mass-spectrometry  
753 experiments for technical reasons, or that PDE2 is indirectly regulated by CDPK3. It has,  
754 for instance, been reported that CDPK3 promotes egress by phosphorylating the egress  
755 suppressor SCE1 (McCoy *et al.*, 2017). Deletion of SCE1 in  $\Delta$ CDPK3 parasites largely  
756 rescues several CDPK3-dependent phosphosites, suggesting that another SCE1-  
757 suppressed kinase is able to partially compensate for loss of CDPK3, and likely amplifies  
758 regular CDPK3-mediated egress under normal conditions.

759 The research community is also continuously identifying novel components involved in  
760 signalling which, once identified, could shed light on how different pathways are  
761 interconnected. For example, a recent report has identified SPARK, a novel kinase that

762 appears to mediate Ca<sup>2+</sup> release in a PKG-dependent manner and can be largely  
763 bypassed via treatment with A23187 (Smith *et al.*, 2021). While A23187 treatment  
764 appears to restore absolute levels of Ca<sup>2+</sup> release in SPARK depleted parasites, the rate  
765 of both calcium release and egress remains partially delayed. These findings suggest that  
766 PKG-regulated SPARK still contributes, to some degree, to A23187-mediated egress.  
767 This observation is in keeping with our proposition that A23187 signalling feeds back into  
768 the PKG signalling pathway.

769 While our study provides strong evidence for a CDPK3-mediated feedback loop to control  
770 rapid egress and nearly overlapping signalling pathways at peak calcium flux, we cannot  
771 draw conclusions about the signalling events at the onset of calcium release.  
772 Nevertheless, our timecourse data identifies rapid CDPK3-dependent differences on  
773 proteins involved in cNTD signalling as early as 15 seconds post-induction, suggesting  
774 that it plays a role at the very onset of the signalling cascades, well before calcium release  
775 peaks. We are still far from identifying all players in the signalling cascades that lead to  
776 egress from the host cell. Arrayed CRISPR screens targeting of the *Toxoplasma* kinome  
777 in  $\Delta$ CDPK3 parasites (Young *et al.*, 2019; Smith *et al.*, 2021) will likely shed further light  
778 on these signalling pathways.

779

780

781

782

783

784

785

786

787

788

789

## 790 **Materials and Methods**

### 791 **Parasite culture and transfection**

792 *T. gondii* tachyzoite RH strains lacking KU80 ( $\Delta ku80$ ) and HXGPRT ( $\Delta hxgprrt$ ) (Fox *et al.*,  
793 2009; Huynh and Carruthers, 2009) were cultured in a confluent monolayer of human  
794 foreskin fibroblasts (HFFs) maintained in Dulbecco's Modified Eagle medium  
795 GlutaMAX™ (DMEM+ GlutaMAX™, Gibco) supplemented with 10% foetal bovine serum  
796 (FBS), at 37°C and 5% CO<sub>2</sub>.

797

### 798 **Plasmid and parasite strain generation**

799 Primers used throughout this study are listed in Table S6. The calcium sensor construct  
800 was generated as recently described (Alves *et al.*, 2021). The construct was linearised  
801 using NaeI and transfected into RH  $\Delta ku80\Delta hxgprrt$  parasites as described previously  
802 (Soldati and Boothroyd, 1993) to generate the GFP-T2A-jRCaMP1b calcium sensor line.  
803 Transgenic parasites were subjected to 5'-fluo-2'-deoxyuridine (FUDR) selection (5  $\mu$ M)  
804 24 hrs after transfection. To generate the GFP-T2A-jRCaMP1b  $\Delta$ CDPK3 line, the  
805 *HXGPRT* cassette (flanked by 5' and 3' DHFR UTR sequences) was PCR amplified from  
806 *pGRA-HA\_HXGPRT* (Coppens *et al.*, 2006) using primers 1/2 (introducing 40bp CDPK3  
807 homology regions to the amplified fragment) and co-transfected into RH  $\Delta ku80\Delta hxgprrt$   
808 with pSag1::Cas9-U6::dbl-sgCDPK3. The pSag1::Cas9-U6::dbl-sgCDPK3 vector was  
809 generated by inverse PCR amplification of the pSag1::Cas9-U6 (Behnke *et al.*, 2014)  
810 vector using primer pairs 3/4 and 3/5 to generate intermediate constructs pSag1::Cas9-  
811 U6::sg1CDPK3 (comprising sgRNA1) and pSag1::Cas9-U6::sg2CDPK3 (comprising  
812 sgRNA2) respectively. Following circularization of both intermediate constructs using  
813 KLD reaction buffer (NEB), a region comprising sgRNA1 was PCR amplified with primers  
814 6 and 7 from pSag1::Cas9-U6::sg1CDPK3 and Gibson assembled into Kpn1/XhoI  
815 linearised pSag1::Cas9-U6:: sg2CDPK3 to generate the double sgRNA plasmid  
816 pSag1::Cas9-U6::dbl-sgCDPK3. Recombinant parasites were selected 24 hrs post  
817 transfection by addition of mycophenolic acid (MPA; 25 $\mu$ g/mL) and xanthine (XAN; 50  
818  $\mu$ g/mL) to culture medium. Integration of the HXGPRT cassette at the CDPK3 locus was  
819 confirmed using primer pairs 8/9 and 10/11 to confirm 5' and 3' integration respectively.  
820 Absence of the endogenous CDPK3 locus was confirmed using primers 12/13.

821

822 To generate the PDE1, PDE2, PDE7 and PDE9 HA-tagged conditional knockout lines,  
823 two separate repair templates were generated for each gene; one which would integrate  
824 a loxP site 100 bp upstream of the start codon, and one that would introduce a C-terminal  
825 HA epitope tag along with a second loxP site and an HXGPRT cassette downstream of  
826 the gene.

827 To generate the pUC19\_PDE1\_5'loxP repair construct, a 1 kb 5' homology region and a  
828 1 kb 3' homology region were PCR amplified from genomic DNA using primers 14/15 and  
829 16/17 respectively, with the primers designed to introduce a loxP site between the 5' and  
830 3' homology regions. The fragments were then Gibson cloned into the BamHI and EcoRI  
831 sites of the pUC19 vector. To generate the pG140\_PDE1-HA\_3'loxP\_HXGPRT plasmid,  
832 a 1 kb 5' homology region was amplified from genomic DNA using primers 18/19 and the  
833 HA tag was amplified from an unpublished in-house plasmid using primers 20/21. These  
834 fragments were Gibson cloned into the HindIII & PacI sites of the pG140 plasmid to  
835 generate an intermediate plasmid. A 1 kb 3' homology region was PCR amplified from  
836 genomic DNA using primers 22/23, while an mCherry coding sequence flanked by Gra  
837 gene UTRs was amplified from pTKO2C (Caffaro *et al.*, 2013) using primers 24/25. These  
838 fragments were subsequently Gibson cloned into the SacI sites of the intermediate  
839 plasmid to generate pG140\_PDE1-HA\_3'loxP\_HXGPRT.

840 The pSag1::Cas9-U6::dbl-sgPDE1 vector was generated by inverse PCR amplification of  
841 the pSag1::Cas9-U6 (Behnke *et al.*, 2014) vector using primer pairs 3/26 and 3/27 to  
842 generate intermediate constructs pSag1::Cas9-U6::sg1PDE1 (comprising sgRNA1) and  
843 pSag1::Cas9-U6::sg2PDE1 (comprising sgRNA2) respectively. Following circularization  
844 of both intermediate constructs using KLD reaction buffer (NEB), a region comprising  
845 sgRNA1 was PCR amplified with primers 6 and 7 from pSag1::Cas9-U6::sg1PDE1 and  
846 Gibson assembled into KpnI/XhoI linearised pSag1::Cas9-U6:: sg2PDE1 to generate the  
847 double sgRNA plasmid pSag1::Cas9-U6::dbl-sgPDE1.

848 After linearising pUC19\_PDE1\_5'loxP with HindIII & EcoRI and pG140\_PDE1-  
849 HA\_3'loxP\_HXGPRT with HindIII & SapI, the two repair templates were co-transfected  
850 with pSag1::Cas9-U6::dbl-sgPDE1 into the RH DiCre  $\Delta ku80\Delta hxgprt$  line (Hunt *et al.*,  
851 2019). Recombinant parasites were selected 24 hrs post transfection by addition of  
852 mycophenolic acid (MPA; 25 $\mu$ g/mL) and xanthine (XAN; 50  $\mu$ g/mL) to culture medium.

853 The same cloning strategy was used for all other PDE cKO lines with the primer pairs  
854 used in each step listed in table S1.

855 To generate the PDE2-HA-cKO $\Delta$ CDPK3 line, the *DHFR-TS* cassette (flanked by GRA1 5'  
856 and GRA2 3' UTR sequences) was PCR amplified from an unpublished in-house plasmid  
857 using primers 28/29 (introducing 40bp CDPK3 homology regions to the amplified  
858 fragment) and co-transfected into RH  $\Delta ku80\Delta hxxgprt$  with pSag1::Cas9-U6::dbl-  
859 sgCDPK3. Recombinant parasites were selected 24 hrs post transfection by addition of  
860 pyrimethamine (1  $\mu$ M) to culture medium.

### 861 **Egress assay**

862 Fresh tachyzoites were harvested and seeded onto confluent HFF monolayers in black  
863 96-well imaging  $\mu$ -plates (Ibidi) at an MOI of 0.5. After 28 hours of growth, egress assays  
864 were performed in triplicate at 37 °C in Ringers buffer (155 mM NaCl, 3 mM KCl, 2 mM  
865 CaCl<sub>2</sub>, 1 mM 556 MgCl<sub>2</sub>, 3 mM NaH<sub>2</sub>PO<sub>4</sub>, 10 mM HEPES, 10 mM glucose). The  
866 parasites were incubated with 8  $\mu$ M Ca<sup>2+</sup> ionophore A23187 (BioVision) or 50  $\mu$ M BIPPO  
867 (generated in-house) for variable timings. Wells were subsequently fixed by adding 16%  
868 FA to a final concentration of 3% for 15 mins. Wells were washed with PBS and stained  
869 with 5  $\mu$ g/ml DAPI. Automated image acquisition of 25 fields per well was performed on  
870 a Cellomics 561 Array Scan VTI HCS reader (Thermo Scientific) using a 20 $\times$  objective.  
871 Image analysis was performed using the Compartmental Analysis BioApplication on HCS  
872 Studio (Thermo Scientific).

873

### 874 **Live imaging of calcium sensor line**

875 Fresh tachyzoites were harvested and seeded (at an MOI of 0.5) onto confluent HFF  
876 cells grown on IBIDI tissue culture treated 8 well chamber slides and allowed to grow for  
877 28 hrs in DMEM + 10%FBS. Prior to imaging, wells were washed once with PBS, and  
878 supplemented with 100  $\mu$ l Ringer's media. Wells were treated for 5 mins at 37°C with 100  
879  $\mu$ l 2  $\mu$ g/ml Cytochalasin D in Ringer's buffer (final concentration 1  $\mu$ g/ml) to prevent  
880 egress. Imaging was performed on the Nikon Eclipse Ti-U inverted fluorescent  
881 microscope, 60x/1.4 NA Oil immersion objective, in environmental chamber (OKOLAB)  
882 with temperature maintained at 37°C. Image capture was managed by Nikon NIS-



883 Elements software with acquisition 1/s for 70s. At 15s following image acquisition, 100 $\mu$ l  
884 of A23187 (24 $\mu$ M) or BIPPO (150  $\mu$ M) in Ringer's buffer was added by pipette (to final  
885 concentrations of 8  $\mu$ M and 50  $\mu$ M respectively).  $\geq 10$  vacuoles across  $\geq 10$  wells were  
886 imaged across  $\geq 7$  days for each condition. Image analysis was performed using Nikon  
887 NIS-Elements analysis software. jRCaMP1b and GFP signals at 0s were set to 0 (zero)  
888 and 1 respectively. jRCaMP1b/GFP was used as a readout for  $\Delta\text{Ca}^{2+}$ .

889

## 890 **Phosphoproteome analysis**

### 891 *Lysis and protein digestion*

892 Parasites were seeded onto HFF monolayers in 15cm culture dishes at an MOI of 5. 24  
893 hours post-inoculation, plates were washed once with PBS and treated with 50  $\mu$ M BIPPO  
894 (15s) or 8  $\mu$ M A23187 (variable timings depending on experiment) in Ringer's buffer.  
895 Following the appropriate treatment duration, treatments were rapidly removed and plates  
896 placed on a supercooled salt water ice bath to inhibit further signalling. Lysis was  
897 performed by scraping cells in ice cold 8 M urea, 75 mM NaCl, 50 mM Tris, pH 8.2,  
898 supplemented with protease (complete mini, Roche) and phosphatase (PhosSTOP,  
899 Roche) inhibitors. Lysis was followed by sonication to reduce sample viscosity (30% duty  
900 cycle, 3 x 30 seconds bursts, on ice). Protein concentration was measured using a BCA  
901 protein assay kit (Pierce). Lysates (1mg each) were subsequently reduced with 5 mM  
902 DTT for 30 minutes at 56  $^{\circ}$ C and alkylated in the dark with 14 mM iodoacetamide for 30  
903 minutes at RT. Following iodoacetamide quenching with 5 mM DTT for 15 minutes in the  
904 dark, lysates were diluted with 50 mM ammonium bicarbonate to  $< 4$ M urea, and digested  
905 with LysC (Promega) for 2-3 hours at 37  $^{\circ}$ C. Lysates were further diluted with 50 mM  
906 ammonium bicarbonate to  $< 2$ M urea and digested with trypsin (Promega) overnight at  
907 37  $^{\circ}$ C. After digestion, samples were acidified with trifluoroacetic acid (TFA) (Thermo  
908 Fisher Scientific) to a final concentration of 1% (v/v). All insoluble material was removed  
909 by centrifugation and the supernatant was desalted on Sep-Pak C<sub>18</sub> cartridges (Waters).

910

### 911 *TMT labelling*

912 Samples were dissolved at 1 mg/ml in 50 mM Na-Hepes, pH 8.5 and 30% acetonitrile  
913 (v/v) and labelled with respective TMT reagents (Thermo Fisher Scientific, 2.4 mg  
914 reagent/1 mg sample) for 1 hour at RT. Labelling was then quenched with 0.3%  
915 hydroxylamine for 15 minutes at RT and samples acidified (pH~2) with formic acid. After  
916 verification of labelling efficiency via mass spectrometry, the lysates were mixed in a 1:1  
917 ratio, vacuum dried and desalted on Sep-Pak C<sub>18</sub> cartridges.

918

### 919 *Phosphopeptide enrichment*

920 Desalted and vacuum dried samples were solubilised in 1 ml of loading buffer (80%  
921 acetonitrile, 5% TFA, 1 M glycolic acid) and mixed with 5 mg of TiO<sub>2</sub> beads (Titansphere,  
922 5 µm GL Sciences Japan). Samples were incubated for 10 minutes with agitation,  
923 followed by a 1 minute 2000 × g spin to pellet the beads. The supernatant was removed  
924 and used for a second round of enrichment as explained below. Beads were washed with  
925 150 µl loading buffer followed by two additional washes, the first with 150 µl 80%  
926 acetonitrile, 1% TFA and the second with 150 µl 10% acetonitrile, 0.2% TFA. After each  
927 wash, beads were pelleted by centrifugation (1 minute at 2000 × g) and the supernatant  
928 discarded. Beads were dried in a vacuum centrifuge for 30 minutes followed by two elution  
929 steps at high pH. For the first elution step, beads were mixed with 100 µl of 1% ammonium  
930 hydroxide (v/v) and for the second elution step with 100 µl of 5% ammonium hydroxide  
931 (v/v). Each time beads were incubated for 10 minutes with agitation and pelleted at 2000  
932 × g for 1 minute. The two elutions were removed following each spin, and subsequently  
933 pooled together before undergoing vacuum drying. The supernatant from the TiO<sub>2</sub>  
934 enrichment was desalted on Sep-Pak C<sub>18</sub> and the High Select Fe-NTA phosphopeptide  
935 enrichment kit (Thermo Fisher Scientific) was used according to manufacturer's  
936 instructions for a second round of enrichment.

937

### 938 *Sample fractionation and desalting*

939 Combined TiO<sub>2</sub> and Fe-NTA phosphopeptide eluates were fractionated using the Pierce  
940 High pH Reversed-Phase kit (Thermo Fisher Scientific) according to manufacturer's  
941 instructions. Resulting fractions were taken to dryness by vacuum centrifugation and  
942 further desalted on a stage tip using Empore C18 discs (3M). Briefly, each stage tip was

943 packed with one C18 disc, conditioned with 100 µl of 100% methanol, followed by 200 µl  
944 of 1% TFA. The sample was loaded in 100 µl of 1% TFA, washed 3 times with 200 µl of  
945 1% TFA and eluted with 50 µl of 50% acetonitrile, 5% TFA. The desalted peptides were  
946 vacuum dried in preparation for LC-MS/MS analysis.

947

#### 948 *LC-MS/MS*

949 Samples were resuspended in 0.1% TFA and loaded on a 50 cm Easy Spray PepMap  
950 column (75 µm inner diameter, 2 µm particle size, Thermo Fisher Scientific) equipped  
951 with an integrated electrospray emitter. Reverse phase chromatography was performed  
952 using the RSLC nano U3000 (Thermo Fisher Scientific) with a binary buffer system  
953 (solvent A: 0.1% formic acid, 5% DMSO; solvent B: 80% acetonitrile, 0.1% formic acid,  
954 5% DMSO) at a flow rate of 250 nl/minute. The samples were run on a linear gradient of  
955 5-60% B in 150 minutes with a total run time of 180 minutes including column conditioning.  
956 The nanoLC was coupled to an Orbitrap Fusion Lumos mass spectrometer using an  
957 EasySpray nano source (Thermo Fisher Scientific). The Orbitrap Fusion Lumos was  
958 operated in data-dependent mode using two acquisition methods. For the MS2 method,  
959 HCD MS/MS scans (R=50,000) were acquired after an MS1 survey scan (R=120, 000)  
960 using MS1 target of 4E5 ions, and MS2 target of 2E5 ions. The number of precursor ions  
961 selected for fragmentation was determined by the “Top Speed” acquisition algorithm with  
962 a cycle time of 3 seconds, and a dynamic exclusion of 60 seconds. The maximum ion  
963 injection time utilised for MS2 scans was 86 ms and the HCD collision energy was set at  
964 38. For the MS3 method, CID MS/MS scans (R=30,000) were acquired after an MS1  
965 survey scan with parameters as above. The MS2 ion target was set at 5E4 with multistage  
966 activation of the neutral loss (H3PO4) enabled. The maximum ion injection time utilised  
967 for MS2 scans was 80 ms and the CID collision energy was set at 35. HCD MS3 scan  
968 (R=60,000) was performed with synchronous precursor selection enabled to include up  
969 to 5 MS2 fragment ions. The ion target was 1E5, maximum ion injection time was 105 ms  
970 and the HCD collision energy was set at 65. Acquired raw data files were processed with  
971 MaxQuant (Cox and Mann, 2008; Cox *et al.*, 2011) (version 1.5.2.8) and peptides were  
972 identified from the MS/MS spectra searched against *Toxoplasma gondii* (combined TG1,  
973 ME48 and VEG proteomes, ToxoDB) and *Homo sapiens* (UniProt, 2018) proteomes  
974 using Andromeda (CITE Cox et al. 2011) search engine. TMT based experiments in

975 MaxQuant were performed using the ‘reporter ion MS2 or MS3’ built-in quantification  
976 algorithm with reporter mass tolerance set to 0.003 Da. Cysteine carbamidomethylation  
977 was selected as a fixed modification. Methionine oxidation, acetylation of protein N-  
978 terminus, deamidation (NQ) and phosphorylation (S, T, Y) were selected as variable  
979 modifications. The enzyme specificity was set to trypsin with a maximum of 2 missed  
980 cleavages. The precursor mass tolerance was set to 20 ppm for the first search (used for  
981 mass re-calibration) and to 4.5 ppm for the main search. The datasets were filtered on  
982 posterior error probability to achieve a 1% false discovery rate on protein, peptide and  
983 site level. ‘Match between runs’ option was enabled for fractionated samples (time  
984 window 0.7 min) and “Unique and razor peptides” mode was selected to allow  
985 identification and quantification of proteins in groups (razor peptides are uniquely  
986 assigned to protein groups and not to individual proteins). All mass spectrometry  
987 acquisition files and MaxQuant processing files have been deposited to the  
988 ProteomeXchange Consortium via the PRIDE (Perez-Riverol *et al.*, 2019) partner  
989 repository (currently awaiting dataset identifier).

990

## 991 **Phosphoproteome data processing**

### 992 *A23187/BIPPO analysis (set1 and set2)*

993 The data were analyzed using Perseus (Tyanova *et al.*, 2016) (version 1.5.0.9) and  
994 Microsoft Office Excel 2016. Briefly, the data were filtered to remove common  
995 contaminants, IDs originating from reverse decoy sequences and sites originating from  
996 the host (human) proteome. Individual TMT reporter intensities (MS2-based acquisition)  
997 and total intensity were log<sub>2</sub> and log<sub>10</sub> transformed, respectively. Log<sub>2</sub> reporter  
998 intensities for each sample were subsequently normalised (centered) by subtracting the  
999 median log<sub>2</sub> reporter intensity value calculated for all non-phosphorylated peptides  
1000 detected in the same sample. Data were then filtered by 1 valid value to retain only the  
1001 quantified phosphosites and log<sub>2</sub> fold changes in reporter intensity between conditions  
1002 were calculated. Differentially regulated (DR) phosphorylation sites were identified by  
1003 calculating the median absolute deviation (MAD) for the log<sub>2</sub>FC in each comparative  
1004 dataset. The largest of these was used to set an outlier threshold of 3x MAD (rounded to  
1005 the nearest tenth; log<sub>2</sub>FC>0.5 for up-regulated sites and log<sub>2</sub>FC<-0.5 for down-regulated  
1006 sites) and applied across all datasets.

1007

1008 *A23187 timecourse analysis*

1009 The data were analyzed using Perseus (Tyanova *et al.*, 2016) (version 1.5.0.9) and  
1010 Microsoft Office Excel 2016. TMT reporter intensities obtained via MS2 and MS3-based  
1011 acquisition were filtered to remove common contaminants, IDs originating from reverse  
1012 decoy sequences and sites originating from the host (human) proteome. MS2/MS3  
1013 reporter intensities and the total intensity were then log2 and log10 transformed,  
1014 respectively. Log2 reporter intensities for each sample were subsequently normalised  
1015 (centered) by subtracting the median log2 reporter intensity value calculated for all non-  
1016 phosphorylated peptides detected in the same sample. Data were then filtered by 1 valid  
1017 value to retain only the quantified phosphosites. Finally, log2 fold changes were  
1018 calculated relative to a 0s (DMSO) control, separately for the MS2 and MS3 data, to obtain  
1019 per site response to ionophore treatment. For downstream analysis responses obtained  
1020 by the MS2 and MS3 based quantification were averaged.

1021 DR thresholds were determined in a timepoint-specific manner by calculating the log2FC  
1022 MADs scores across each WT timepoint (15s, 30s and 60s), and setting 3x MAD outlier  
1023 thresholds for each (rounded to the nearest tenth: 15s log2FC<-0.5 for DR<sup>DOWN</sup> and 15s  
1024 log2FC>0.5 for DR<sup>UP</sup>; 30s log2FC<-0.6 for DR<sup>DOWN</sup> and 30s log2FC>0.6 for DR<sup>UP</sup>; 60s  
1025 log2FC<-0.9 for DR<sup>DOWN</sup> and 60s log2FC>0.9 for DR<sup>UP</sup>). Phosphorylation sites were  
1026 considered to be differentially regulated if at any given timepoint their log2FC surpassed  
1027 these thresholds.

1028 CDPK3 dependency, was determined for each phosphorylation site by calculating the  
1029 log2 ratios of A23187-treated WT and  $\Delta$ CDPK3 parasites ( $\Delta$ CDPK3<sup>A23187</sup>/WT<sup>A23187</sup>) for  
1030 each timepoint. The resulting ratios were used to calculate the MAD at each timepoint,  
1031 and the most stringent score was used to set 3X MAD outlier thresholds (rounded to the  
1032 nearest tenth: log2FC<-0.6 for CDPK3 dependency in DR<sup>UP</sup> sites and log2FC>0.6 for  
1033 CDPK3 dependency in DR<sup>DOWN</sup> sites). A DR site was considered to be CDPK3-dependent  
1034 if, at any given timepoint, it simultaneously passed the appropriate DR and CDPK3  
1035 dependency thresholds.

1036

1037

1038 *Clustering*

1039 Phosphosite log<sub>2</sub>FC values from the timecourse experiment were clustered using a  
1040 Gaussian finite mixture model-based method (Scrucca *et al.*, 2016) log<sub>2</sub>FC values from  
1041 both the WT and  $\Delta$ CDPK3 samples were combined, thus the clustering was performed  
1042 on six dimensions: WT 15s, 30s and 60s and  $\Delta$ CDPK3 15s, 30s and 60s. The method  
1043 was restricted to spherical models with equal or unequal volumes (models “EII” and “VII”)  
1044 and models with up to 11 clusters were tested. The clustering method was applied  
1045 separately to the sites designated as up-regulated, down-regulated, and CDPK3-  
1046 dependent.

1047 *Gene Ontology Enrichment*

1048 Each cluster was tested for an enrichment in Gene Ontology annotations using goatools  
1049 version 0.8.12 (Klopfenstein *et al.*, 2018). The ontology was downloaded from  
1050 <https://geneontology.org> on 2019 April 17. All tests were performed using Fisher’s Exact  
1051 Test and p-values were adjusted for false discovery rate.

1052 *Motif Analysis*

1053 The sequence surrounding each DR timecourse phosphosite, +/-7 residues, was  
1054 subjected to a motif analysis using rmotifx 1.0 (motif enrichment; Wagih, Reimand, &  
1055 Bader, 2015) and WebLogo 3.7.1 (Crooks *et al.*, 2004). The analysis was performed for  
1056 each cluster as well as for the combined sets of phosphosites designated as up-regulated,  
1057 down-regulated and CDPK3-dependent.

1058

1059 **Measurement of cyclic nucleotide levels in extracellular parasites**

1060 Parasites were seeded onto HFF monolayers in T175 flasks. After 24-30 hours, flasks  
1061 were washed once with PBS, then scraped and syringe lysed in endo buffer (44.7 mM  
1062 K<sub>2</sub>SO<sub>4</sub>, 10 mM MgSO<sub>4</sub>, 106 mM sucrose, 5 mM glucose, 20 mM Tris–H<sub>2</sub>SO<sub>4</sub>, pH 8.2)/  
1063 After counting, the parasites were aliquoted into eppendorfs and treated with 50  $\mu$ M  
1064 BIPPO, 8  $\mu$ M A23187 or the equivalent volume of DMSO for the variable timings while  
1065 maintained at 37°C. The samples were then lysed by adding two volumes of 0.1 M HCl  
1066 and left on ice for 10 minutes with intermittent vortexing. The levels of cAMP and cGMP  
1067 levels in the samples was determined using the enzyme-linked immunosorbent assay

1068 (ELISA)-based high-sensitivity direct cAMP and cGMP colorimetric assay kits (Enzo Life  
1069 Sciences). Samples and standards were acetylated in order to improve sensitivity. All  
1070 samples and standards were set up in duplicate. Absorbance was measured at 405nm  
1071 using a FLUOstar Omega plate reader. The detection ranges were 0.078 to 20 pmol/ml  
1072 and 0.08 to 50 pmol/ml for the cAMP and cGMP assays, respectively.

1073

## 1074 **DAG & Global Lipid Metabolomics**

1075 For the DAG and lipid kinetics experiments, parasites were grown for 3 days in DMEM  
1076 containing 10% FBS and syringe released by passing through a 23-gauge needle. Lysed  
1077 parasites were filtered through a 10 µm polycarbonate filter, counted and then pelleted  
1078 (1,800 rpm, 10 min). After washing pellets with DMEM containing 10 mM HEPES,  
1079 parasites were aliquoted to achieve  $1 \times 10^8$  cells per tube and maintained at room  
1080 temperature. Parasites were shifted to 37°C and allowed to equilibrate for 60 seconds  
1081 before addition of pre-warmed DMEM containing either DMSO or 8 µM A23187. Parasites  
1082 were allowed to incubate for the desired time and quenched immediately on dry  
1083 ice/ethanol for 5 seconds then left on ice. Cells were pelleted (8,000 rpm, 2 min) and  
1084 washed with 3x with 1 ml of ice-cold PBS. Cells were pelleted, supernatant aspirated and  
1085 pellets stored at -80°C until required.

1086

1087 Alternatively for global lipidomics, scraped tachyzoite cultures without stimulus were  
1088 rapidly quenched in a dry ice ethanol bath and placed on ice. Tachyzoites were then  
1089 needle passed and filtered on ice and pelleted (1800 rpm, 10 minutes) at 4°C. Cells were  
1090 washed twice with ice cold 1x PBS and then pellets were stored at -80 until required.

1091

## 1092 **Lipid analysis**

1093 Total lipids and internal standards were extracted using chloroform:methanol, 1:2 (v/v)  
1094 and chloroform:methanol, 2:1 (v/v) in the presence of 0.1 M HCl with periodic sonication.  
1095 The organic phase was dried under N<sub>2</sub> gas and dissolved in 1-butanol. For DAG, total  
1096 lipid was then separated by 1D-HPTLC using hexane : diethyl-ether : formic Acid, 40:10:1.  
1097 For global phospholipid analysis including PA, total lipid was spiked with 1 µg

1098 PA(C17:0/C17:0) (Avanti Polar lipids) and then separated by 2D-HPTLC using  
1099 chloroform/methanol/28% NH<sub>4</sub>OH, 60:35:8 (v/v) as the 1st dimension solvent system and  
1100 chloroform/acetone/methanol/acetic acid/water, 50:20:10:13:5 (v/v) as the 2nd dimension  
1101 solvent system (Amiar *et al.*, 2016). All lipid spots including PA were visualised with  
1102 primulin and scraped. Lipids and additional standards were then prepared for GC-MS  
1103 analysis in hexane (Agilent 5977A- 7890B) after derivatisation by methanolysis using 0.5  
1104 M HCl in methanol incubated at 85°C for 3.5 hrs. Fatty acid methyl esters were identified  
1105 by their mass spectrum and retention time compared to authentic standards. Individual  
1106 lipid classes were normalised according to internal standards.

1107

### 1108 **Parasite protein extraction, SDS-PAGE, and immunoblotting**

1109 Intracellular parasites were scraped and syringe released HFFs by passing through a 23-  
1110 gauge needle. Extracellular parasites were pelleted (8,000 rpm, 10 min) then lysed in an  
1111 NP40 buffer (150mM NaCl, 0.5mM EDTA, 1% NP-40, 10mM Tris [pH 7.5]) supplemented  
1112 with cOmplete EDTA-free protease inhibitor (Roche). Samples were incubated on ice for  
1113 10 min, then centrifuged at 12,000xg for 10 min at 4°C and supernatants collected.  
1114 Following the addition of SDS sample buffer, the samples were electrophoresed on 4-  
1115 20% Mini-Protean TGX stain-free precast gels (Bio-Rad) then transferred onto  
1116 nitrocellulose mem- branes using a semidry Trans-Blot Turbo transfer system (Bio-Rad).  
1117 The membranes were blocked using 10% skimmed milk in PBS containing 0.1% Tween  
1118 20 (PBST) and then incubated with rat anti-HA high affinity (1:1,000; Roche) and rabbit  
1119 anti-T. gondii CAP (1:2,000; Hunt *et al.*, 2019) for 1 hour, followed by donkey anti-rabbit  
1120 IRDye 680LT (1:20,000; LI-COR) and goat anti-rat IRDye 800CW (1:20,000; LI-COR) for  
1121 1 hour. After several washed with PBS, the remaining bound near-infrared conjugated  
1122 secondary antibodies were visualised using the Odyssey Infrared Imaging System (LI-  
1123 COR Biosciences, Nebraska, United States).

1124

### 1125 **Immunofluorescence microscopy**

1126 Parasites were seeded onto HFFs grown in chambered coverslip slides (Ibidi). After 18-  
1127 24 hours, the chambers were washed with PBS, then fixed in 3% formaldehyde in PBS  
1128 for 15 minutes. The cells were then permeabilised using 0.1% Triton X-100 in PBS for 10



1129 minutes, then blocked in 3% BSA in PBS for 1 hour. The samples were then incubated  
1130 rat anti-HA high affinity (1:1,000; Roche) and rabbit anti-T. gondii CAP (1:2,000; Hunt et  
1131 al., 2019) for 1 hour followed by goat anti-rabbit Alexa Flour 594 (1:2,000; Life  
1132 Technologies) and donkey anti-rat Alexa Flour 488 (1:2,000; Life Technologies)  
1133 secondary antibodies along with 5 µg/ml DAPI for 1 hour. Images were obtained using a  
1134 Nikon Eclipse Ti-U inverted fluorescent microscope using a 100x objective and processed  
1135 using ImageJ software.

1136

### 1137 **PDE Pulldown**

1138 HFF monolayers infected with WT or HA-tagged PDE1, PDE2, PDE7 or PDE9 lines were  
1139 scraped, syringe-released and counted. A total of  $1 \times 10^7$  cells per condition were pelleted  
1140 (8,000 rpm, 10 min) then lysed in 10 µl of NP-40 buffer (150mM NaCl, 0.5mM EDTA, 1%  
1141 NP-40, 10mM Tris [pH 7.5]) supplemented with cOmplete EDTA-free protease inhibitor  
1142 (Roche) for 10 minutes on ice. Samples were centrifuged at 12,000 xg for 10 min at 4°C,  
1143 the supernatants collected and the volume adjusted to 100 µl with IP buffer (150mM NaCl,  
1144 0.5mM EDTA, 10mM Tris [pH 7.5] and cOmplete EDTA-free protease inhibitor) to give a  
1145 final detergent concentration of 0.1%. To pull down HA-tagged PDEs, Pierce anti-HA  
1146 conjugated magnetic beads (5 µl per condition, Thermo Fisher) were washed 3x with IP  
1147 buffer to equilibrate the beads, after which the diluted lysate samples was added to the  
1148 beads and incubated for 2 hours at 4°C on a rotating wheel. After incubation, the  
1149 supernatant was discarded and the beads washed 3x with IP buffer.

1150

### 1151 **PDE Assay**

1152 The hydrolytic activity of immunoprecipitated PDEs bound to anti-HA magnetic beads was  
1153 measured using the PDE-Glo assay (Promega), a bioluminescence-based assay which  
1154 quantifies the amount of cAMP or cGMP hydrolysed by a given PDE. Briefly, the PDE-  
1155 bound magnetic beads were resuspended in assay buffer and incubated with either 1 µM  
1156 cAMP or 10 µM cGMP for 1 hour at room temperature and the reaction terminate by the  
1157 addition of termination buffer. Detection buffer was added and incubated for 20 minutes,  
1158 followed by the addition of Kinase-Glo detection solution which was incubated for a further  
1159 10 minutes. The supernatants were then transferred to a white 96-well plate and

1160 luminescence measured using a FLUOstar Omega plate reader. To test the inhibitory  
1161 effects of BIPPO on the activity of the PDEs, 25  $\mu$ M BIPPO or the equivalent volume of  
1162 DMSO was added to the reaction buffer and left to incubated for 10 minutes before  
1163 addition of cyclic nucleotide.

1164

## 1165 **Plaque Assays**

1166 Intracellular parasites were treated with 50 nM RAP or the equivalent volume of DMSO  
1167 for 4 hours, after which the media was replaced, and the parasites left to grow for 3 days  
1168 to ensure efficient turnover of the PDEs in the RAP-treated samples. DMSO- and RAP-  
1169 treated parasites were harvested by syringe lysis, counted and 250 parasites seeded on  
1170 confluent HFFs grown in T25 flasks. Plaques were allowed to form for 5 days, after which  
1171 cells were fixed in 100% ice cold methanol for 2 minutes and then stained with 0.1%  
1172 crystal violet for 10 minutes to visualise the plaques. Images of the plaques were acquired  
1173 with a 4x objective using an Olympus CKX53 microscope fitted with an Olympus DP74  
1174 camera. Plaque areas were determined using ImageJ software.

1175

## 1176 **Acknowledgments**

1177 We would like to thank members of the Treeck lab for critical discussions as well as  
1178 Matthew Child for critical reading of the manuscript. We also thank Michael Howell from  
1179 the High Throughput Screening Science Technology Platform (HTS-STP), which receives  
1180 Core Funding at the Francis Crick Institute (FC001999), for performing the imaging for  
1181 the egress assays. This work was supported by awards to M.T and G.A by the National  
1182 Institute of Health (NIH-R01AI123457) and to M.T by The Francis Crick Institute  
1183 (<https://www.crick.ac.uk/>), which receives its core funding from Cancer Research UK  
1184 (FC001189; <https://www.cancerresearchuk.org>), the UK Medical Research Council  
1185 (FC001189; <https://www.mrc.ac.uk/>) and the Wellcome Trust (FC001189;  
1186 <https://wellcome.ac.uk/>). H.F is supported by Core Funding to the Proteomics Facility  
1187 at the Francis Crick Institute (Francis Crick Institute (FC001999). B.M.I. acknowledges  
1188 support from a Wellcome Trust Institutional Strategic Support Award to the University of  
1189 Exeter (204909/Z/16/Z) and, for the purpose of open access, have applied a CC BY public  
1190 copyright license to any author's accepted manuscript version arising from this

1191 submission. The work performed by C.Y.B., and N.J.K is supported by Fondation pour la  
1192 Recherche Médicale (FRM, EQU202103012700), Agence Nationale de la Recherche,  
1193 France (grant ANR-21-CE44-0010-01, Project ApicoLipidAdapt), Région Auvergne  
1194 Rhône Alpes (Grant AuRA IRICE GEMELI), Finovi program (Apicolipid project),  
1195 Laboratoire d'Excellence Parafrap, France (grant ANR-11-LABX-0024), LIA-IRP CNRS  
1196 Program (Apicolipid project), CEFIPRA-MESRI (Project 6003-1), IDEX Université  
1197 Grenoble-Alpes. The authors declare that they have no conflict of interest.

1198

1199

1200

1201

1202

1203

1204

1205

1206

1207

1208

1209

1210

1211

1212

1213

1214

1215

1216 **References**

- 1217 Absalon, S. *et al.* (2018) 'Calcium-Dependent Protein Kinase 5 Is Required for Release  
1218 of Egress-Specific Organelles in Plasmodium falciparum', *mBio*, 9(1), pp. 1–16.
- 1219 Alves, E. *et al.* (2021) 'An Extracellular Redox Signal Triggers Calcium Release and  
1220 Impacts the Asexual Development of Toxoplasma gondii', *Frontiers in Cellular and*  
1221 *Infection Microbiology*, 11(August), pp. 1–14. doi: 10.3389/fcimb.2021.728425.
- 1222 Amiar, S. *et al.* (2016) 'Apicoplast-Localized Lysophosphatidic Acid Precursor Assembly  
1223 Is Required for Bulk Phospholipid Synthesis in Toxoplasma gondii and Relies on an  
1224 Algal/Plant-Like Glycerol 3-Phosphate Acyltransferase', *PLOS Pathogens*. Public  
1225 Library of Science, 12(8), p. e1005765. doi: 10.1371/JOURNAL.PPAT.1005765.
- 1226 Arrizabalaga, G. *et al.* (2004) 'Ionophore-resistant mutant of Toxoplasma gondii reveals  
1227 involvement of a sodium/hydrogen exchanger in calcium regulation', *Journal of Cell*  
1228 *Biology*, 165(5), pp. 653–662. doi: 10.1083/jcb.200309097.
- 1229 Behnke, M. S. *et al.* (2014) 'Toxoplasma gondii merozoite gene expression analysis  
1230 with comparison to the life cycle discloses a unique expression state during enteric  
1231 development', *BMC Genomics*. BioMed Central Ltd., 15(1), pp. 1–18. doi:  
1232 10.1186/1471-2164-15-350/FIGURES/7.
- 1233 Billker, O., Lourido, S. and Sibley, L. D. (2009) 'Calcium-Dependent Signaling and  
1234 Kinases in Apicomplexan Parasites', *Cell Host and Microbe*. Elsevier Inc., 5(6), pp.  
1235 612–622. doi: 10.1016/j.chom.2009.05.017.
- 1236 Bisio, H. *et al.* (2019) 'Phosphatidic acid governs natural egress in Toxoplasma gondii  
1237 via a guanylate cyclase receptor platform', *Nature microbiology*. Nat Microbiol, 4(3), pp.  
1238 420–428. doi: 10.1038/S41564-018-0339-8.
- 1239 Black, M. W. and Boothroyd, J. C. (2000) 'Lytic Cycle of Toxoplasma gondii',  
1240 *Microbiology and Molecular Biology Reviews*, 64(3), pp. 607–623. doi:  
1241 10.1128/mmbr.64.3.607-623.2000.
- 1242 Brochet, M. *et al.* (2014) 'Phosphoinositide Metabolism Links cGMP-Dependent Protein  
1243 Kinase G to Essential Ca<sup>2+</sup> Signals at Key Decision Points in the Life Cycle of Malaria  
1244 Parasites', *PLoS Biology*, 12(3). doi: 10.1371/journal.pbio.1001806.
- 1245 Brown, K. M., Long, S. and Sibley, L. D. (2017) 'Plasma membrane association by N-  
1246 acylation governs PKG function in Toxoplasma gondii', *mBio*, 8(3). doi:  
1247 10.1128/mBio.00375-17.
- 1248 Brown, K. M., Lourido, S. and Sibley, L. D. (2016) 'Serum albumin stimulates protein  
1249 kinase G-dependent microneme secretion in Toxoplasma gondii', *Journal of Biological*  
1250 *Chemistry*. American Society for Biochemistry and Molecular Biology Inc., 291(18), pp.  
1251 9554–9565. doi: 10.1074/JBC.M115.700518/ATTACHMENT/130644F7-914C-4EBC-  
1252 923E-8E170F535236/MMC1.ZIP.
- 1253 Bullen, H. E. *et al.* (2016) 'Phosphatidic Acid-Mediated Signaling Regulates Microneme  
1254 Secretion in Toxoplasma Article Phosphatidic Acid-Mediated Signaling Regulates

- 1255 Microneme Secretion in Toxoplasma', *Cell Host & Microbe*, pp. 349–360. doi:  
1256 10.1016/j.chom.2016.02.006.
- 1257 Caffaro, C. E. *et al.* (2013) 'A Nucleotide Sugar Transporter Involved in Glycosylation of  
1258 the Toxoplasma Tissue Cyst Wall Is Required for Efficient Persistence of Bradyzoites',  
1259 *PLOS Pathogens*. Public Library of Science, 9(5), p. e1003331. doi:  
1260 10.1371/JOURNAL.PPAT.1003331.
- 1261 Carruthers, V. B. and Sibley, L. D. (1999) 'Mobilization of intracellular calcium stimulates  
1262 microneme discharge in Toxoplasma gondii', *Molecular Microbiology*, 31(2), pp. 421–  
1263 428. doi: 10.1046/j.1365-2958.1999.01174.x.
- 1264 Coppens, I. *et al.* (2006) 'Toxoplasma gondii sequesters lysosomes from mammalian  
1265 hosts in the vacuolar space', *Cell*, 125(2), pp. 261–274. doi:  
1266 10.1016/J.CELL.2006.01.056.
- 1267 Cox, J. *et al.* (2011) 'Andromeda: a peptide search engine integrated into the MaxQuant  
1268 environment', *Journal of proteome research*. J Proteome Res, 10(4), pp. 1794–1805.  
1269 doi: 10.1021/PR101065J.
- 1270 Cox, J. and Mann, M. (2008) 'MaxQuant enables high peptide identification rates,  
1271 individualized p.p.b.-range mass accuracies and proteome-wide protein quantification',  
1272 *Nature Biotechnology* 2008 26:12. Nature Publishing Group, 26(12), pp. 1367–1372.  
1273 doi: 10.1038/nbt.1511.
- 1274 Crooks, G. E. *et al.* (2004) 'WebLogo: a sequence logo generator', *Genome research*.  
1275 Genome Res, 14(6), pp. 1188–1190. doi: 10.1101/GR.849004.
- 1276 Endo, T. *et al.* (1987) 'Effects of Extracellular Potassium on Acid Release and Motility  
1277 Initiation in Toxoplasma gondii', *The Journal of Protozoology*, 34(3), pp. 291–295. doi:  
1278 10.1111/j.1550-7408.1987.tb03177.x.
- 1279 Farrell, A. *et al.* (2012) 'A DOC2 Protein Identified by Mutational Profiling is Essential for  
1280 Apicomplexan Parasite Exocytosis', *Science*, 335(6065), pp. 218–221. doi:  
1281 10.1086/597422.Tumor.
- 1282 Flueck, C. *et al.* (2019) *Phosphodiesterase beta is the master regulator of camp*  
1283 *signalling during malaria parasite invasion*, *PLoS Biology*. doi:  
1284 10.1371/journal.pbio.3000154.
- 1285 Fox, B. A. *et al.* (2009) 'Efficient Gene Replacements in Toxoplasma gondii Strains  
1286 Deficient for Nonhomologous End Joining †', *EUKARYOTIC CELL*, 8(4), pp. 520–529.  
1287 doi: 10.1128/EC.00357-08.
- 1288 Francia, M. E. *et al.* (2005) 'A Toxoplasma gondii protein with homology to intracellular  
1289 type Na<sup>+</sup> /H<sup>+</sup> Exchangers is important for osmoregulation and invasion', *Experimental*  
1290 *Cell Research*, 317(1), pp. 1382–1397. doi: 10.1016/j.yexcr.2011.03.020.
- 1291 Gaji, R. Y. *et al.* (2015) 'Phosphorylation of a Myosin Motor by TgCDPK3 Facilitates  
1292 Rapid Initiation of Motility during Toxoplasma gondii egress', *PLoS Pathogens*, 11(11),  
1293 pp. 1–20. doi: 10.1371/journal.ppat.1005268.

- 1294 Garcia, C. R. S. *et al.* (2017) 'InsP3 Signaling in Apicomplexan Parasites', *Current*  
1295 *Topics in Medicinal Chemistry*, 17(19), pp. 2158–2165. doi:  
1296 10.2174/1568026617666170130121042.
- 1297 Garrison, E. *et al.* (2012) 'A Forward Genetic Screen Reveals that Calcium-dependent  
1298 Protein Kinase 3 Regulates Egress in *Toxoplasma*', *PLoS Pathogens*, 8(11). doi:  
1299 10.1371/journal.ppat.1003049.
- 1300 Howard, B. L. *et al.* (2015) 'Identification of potent phosphodiesterase inhibitors that  
1301 demonstrate cyclic nucleotide-dependent functions in apicomplexan parasites', *ACS*  
1302 *Chemical Biology*, 10(4), pp. 1145–1154. doi: 10.1021/cb501004q.
- 1303 Hunt, A. *et al.* (2019) 'Differential requirements for cyclase-associated protein (CAP) in  
1304 actin-dependent processes of *Toxoplasma gondii*', *eLife*. eLife Sciences Publications,  
1305 Ltd, 8. doi: 10.7554/ELIFE.50598.
- 1306 Huynh, M. H. and Carruthers, V. B. (2009) 'Tagging of endogenous genes in a  
1307 *Toxoplasma gondii* strain lacking Ku80', *Eukaryotic cell*. Eukaryot Cell, 8(4), pp. 530–  
1308 539. doi: 10.1128/EC.00358-08.
- 1309 Invergo, B. M. *et al.* (2017) 'Sub-minute Phosphoregulation of Cell Cycle Systems  
1310 during Plasmodium Gamete Formation', *Cell Reports*, 21(7), pp. 2017–2029. doi:  
1311 10.1016/j.celrep.2017.10.071.
- 1312 Jia, Y. *et al.* (2017) ' Crosstalk between PKA and PKG controls pH -dependent host cell  
1313 egress of *Toxoplasma gondii* ', *The EMBO Journal*, 36(21), pp. 3250–3267. doi:  
1314 10.15252/embj.201796794.
- 1315 Katris, N. J. *et al.* (2020) 'Rapid kinetics of lipid second messengers controlled by a  
1316 cGMP signalling network coordinates apical complex functions in *Toxoplasma*  
1317 tachyzoites', *bioRxiv*. doi: 10.1101/2020.06.19.160341.
- 1318 Klopfenstein, D. V. *et al.* (2018) 'GOATOOLS: A Python library for Gene Ontology  
1319 analyses', *Scientific Reports 2018 8:1*. Nature Publishing Group, 8(1), pp. 1–17. doi:  
1320 10.1038/s41598-018-28948-z.
- 1321 LaFavers, K. A. *et al.* (2017) 'A novel dense granule protein, GRA41, regulates timing of  
1322 egress and calcium sensitivity in *Toxoplasma gondii*', *Cellular Microbiology*, 19(9), pp.  
1323 1–20. doi: 10.1111/cmi.12749.
- 1324 Leykauf, K. *et al.* (2010) 'Protein Kinase A Dependent Phosphorylation of Apical  
1325 Membrane Antigen 1 Plays an Important Role in Erythrocyte Invasion by the Malaria  
1326 Parasite', *PLoS Pathogens*, 6(6), p. e1000941. doi: 10.1371/journal.ppat.1000941.
- 1327 Long, S., Wang, Q. and Sibley, L. D. (2016) 'Analysis of noncanonical  
1328 calciumdependent protein kinases in *Toxoplasma gondii* by targeted gene deletion  
1329 using CRISPR/Cas9', *Infection and Immunity*, 84(5), pp. 1262–1273. doi:  
1330 10.1128/IAI.01173-15.
- 1331 Lourido, S. *et al.* (2013) 'Exploiting the unique ATP-binding pocket of toxoplasma  
1332 calcium-dependent protein kinase 1 to identify its substrates', *ACS Chemical Biology*.

- 1333 American Chemical Society, 8(6), pp. 1155–1162. doi:  
1334 10.1021/CB400115Y/SUPPL\_FILE/CB400115Y\_SI\_001.PDF.
- 1335 Lourido, S. and Moreno, S. N. J. (2015) ‘The Calcium Signaling Toolkit of the  
1336 Apicomplexan Parasites *Toxoplasma gondii* and *Plasmodium* spp’, *Cell Calcium*, 57(3),  
1337 pp. 186–193. doi: 10.1016/j.ceca.2014.12.010.The.
- 1338 Lourido, S., Tang, K. and David Sibley, L. (2012) ‘Distinct signalling pathways control  
1339 *Toxoplasma* egress and host-cell invasion’, *EMBO Journal*. Nature Publishing Group,  
1340 31(24), pp. 4524–4534. doi: 10.1038/emboj.2012.299.
- 1341 Lovett, J. L. *et al.* (2002) ‘*Toxoplasma gondii* microneme secretion involves intracellular  
1342 Ca<sup>2+</sup> release from inositol 1,4,5-triphosphate (IP<sub>3</sub>)/ryanodine-sensitive stores’, *Journal*  
1343 *of Biological Chemistry*. © 2002 ASBMB. Currently published by Elsevier Inc; originally  
1344 published by American Society for Biochemistry and Molecular Biology., 277(29), pp.  
1345 25870–25876. doi: 10.1074/jbc.M202553200.
- 1346 McCoy, J. M. *et al.* (2012) ‘TgCDPK3 Regulates Calcium-Dependent Egress of  
1347 *Toxoplasma gondii* from Host Cells’, *PLoS Pathogens*, 8(12). doi:  
1348 10.1371/journal.ppat.1003066.
- 1349 McCoy, J. M. *et al.* (2017) ‘A forward genetic screen identifies a negative regulator of  
1350 rapid Ca<sup>2+</sup>-dependent cell egress (MS1) in the intracellular parasite *Toxoplasma*  
1351 *gondii*’, *Journal of Biological Chemistry*, 292(18), pp. 7662–7674. doi:  
1352 10.1074/jbc.M117.775114.
- 1353 Moss, W. J. *et al.* (2021) ‘Functional Analysis of the Expanded Phosphodiesterase  
1354 Gene Family in *Toxoplasma gondii* Tachyzoites’, *bioRxiv*, p. 6. doi:  
1355 <https://doi.org/10.1101/2021.09.21.461320>.
- 1356 Moudy, R., Manning, T. J. and Beckers, C. J. (2001) ‘The loss of cytoplasmic potassium  
1357 upon host cell breakdown triggers egress of *Toxoplasma gondii*’, *The Journal of*  
1358 *biological chemistry*. J Biol Chem, 276(44), pp. 41492–41501. doi:  
1359 10.1074/JBC.M106154200.
- 1360 Ono, T. *et al.* (2008) ‘Adenylyl cyclase  $\alpha$  and cAMP signaling mediate *Plasmodium*  
1361 sporozoite apical regulated exocytosis and hepatocyte infection’, *PLoS Pathogens*, 4(2).  
1362 doi: 10.1371/journal.ppat.1000008.
- 1363 Pappas, G., Roussos, N. and Falagas, M. E. (2009) ‘Toxoplasmosis snapshots: global  
1364 status of *Toxoplasma gondii* seroprevalence and implications for pregnancy and  
1365 congenital toxoplasmosis’, *International journal for parasitology*. Int J Parasitol, 39(12),  
1366 pp. 1385–1394. doi: 10.1016/J.IJPARA.2009.04.003.
- 1367 Patel, A. *et al.* (2019) *Cyclic AMP signalling controls key components of malaria*  
1368 *parasite host cell invasion machinery*, *PLoS Biology*. doi: 10.1371/journal.pbio.3000264.
- 1369 Pearce, L. R., Komander, D. and Alessi, D. R. (2010) ‘The nuts and bolts of AGC  
1370 protein kinases’, *Nature Reviews Molecular Cell Biology*. Nature Publishing Group,  
1371 11(1), pp. 9–22. doi: 10.1038/nrm2822.
- 1372 Perez-Riverol, Y. *et al.* (2019) ‘The PRIDE database and related tools and resources in

- 1373 2019: improving support for quantification data', *Nucleic Acids Research*. Oxford  
1374 Academic, 47(D1), pp. D442–D450. doi: 10.1093/NAR/GKY1106.
- 1375 Roiko, M. S., Svezhova, N. and Carruthers, V. B. (2014) 'Acidification Activates  
1376 *Toxoplasma gondii* Motility and Egress by Enhancing Protein Secretion and Cytolytic  
1377 Activity', *PLOS Pathogens*. Public Library of Science, 10(11), p. e1004488. doi:  
1378 10.1371/JOURNAL.PPAT.1004488.
- 1379 Scrucca, L. *et al.* (2016) 'mclust 5: Clustering, Classification and Density Estimation  
1380 Using Gaussian Finite Mixture Models', *The R Journal*. NIH Public Access, 8(1), p. 289.  
1381 doi: 10.32614/rj-2016-021.
- 1382 Smith, T. A. *et al.* (2021) 'High-throughput functionalization of the *Toxoplasma* kinome  
1383 uncovers a novel regulator of invasion and egress', *bioRxiv*, pp. 1–33.
- 1384 Soldati, D. and Boothroyd, J. C. (1993) 'Transient transfection and expression in the  
1385 obligate intracellular parasite *Toxoplasma gondii*', *Science*, 260(5106), pp. 349–352.  
1386 doi: 10.1126/SCIENCE.8469986.
- 1387 Stewart, R. J. *et al.* (2017) 'Analysis of Ca<sup>2+</sup> mediated signaling regulating *Toxoplasma*  
1388 infectivity reveals complex relationships between key molecules', *Cellular Microbiology*,  
1389 19(4). doi: 10.1111/cmi.12685.
- 1390 Treeck, M. *et al.* (2014) 'The Calcium-Dependent Protein Kinase 3 of *Toxoplasma*  
1391 Influences Basal Calcium Levels and Functions beyond Egress as Revealed by  
1392 Quantitative Phosphoproteome Analysis', *PLoS Pathogens*, 10(6). doi:  
1393 10.1371/journal.ppat.1004197.
- 1394 Tyanova, S. *et al.* (2016) 'The Perseus computational platform for comprehensive  
1395 analysis of (prote)omics data', *Nature methods*. Nat Methods, 13(9), pp. 731–740. doi:  
1396 10.1038/NMETH.3901.
- 1397 Uboldi, A. D. *et al.* (2018) *Protein kinase A negatively regulates Ca<sup>2+</sup> signalling in*  
1398 *Toxoplasma gondii*, *PLoS Biology*. doi: 10.1371/journal.pbio.2005642.
- 1399 Vo, K. C. *et al.* (2020) 'The protozoan parasite *Toxoplasma gondii* encodes a gamut of  
1400 phosphodiesterases during its lytic cycle in human cells', *Computational and Structural*  
1401 *Biotechnology Journal*. The Author(s), 18, pp. 3861–3876. doi:  
1402 10.1016/j.csbj.2020.11.024.
- 1403 Wagih, O., Reimand, J. and Bader, G. D. (2015) 'MIMP: predicting the impact of  
1404 mutations on kinase-substrate phosphorylation', *Nature Methods* 2015 12:6. Nature  
1405 Publishing Group, 12(6), pp. 531–533. doi: 10.1038/nmeth.3396.
- 1406 Wallbank, B. A. *et al.* (2019) 'Characterisation of the *Toxoplasma gondii* tyrosine  
1407 transporter and its phosphorylation by the calcium-dependent protein kinase 3',  
1408 *Molecular Microbiology*, 111(5), pp. 1167–1181. doi: 10.1111/mmi.14156.
- 1409 Wiersma, H. I. *et al.* (2004) 'A role for coccidian cGMP-dependent protein kinase in  
1410 motility and invasion', *International Journal for Parasitology*, 34(3), pp. 369–380. doi:  
1411 10.1016/j.ijpara.2003.11.019.



1412 Young, J. *et al.* (2019) 'A CRISPR platform for targeted in vivo screens identifies  
1413 *Toxoplasma gondii* virulence factors in mice', *Nature Communications*. Springer US,  
1414 10(1), pp. 1–11. doi: 10.1038/s41467-019-11855-w.

1415

1416

#### 1417 **List of supplementary documents associated with the manuscript**

1418

1419 **Data S1** – Phosphopeptide quantifications and calculated logFCs from A23187/BIPPO  
1420 treated WT/ $\Delta$ CDPK3 parasites. Tabs include data subsets that were subjected to  
1421 thresholding for differential regulation in A23187 and/or BIPPO treatment conditions.  
1422 Includes data from TMT sets 1 and 2.

1423

1424 **Data S2** – Phosphopeptide quantifications and calculated logFCs for peptides that were  
1425 (i) differentially regulated following A23187/BIPPO treatment and (ii) were detected  
1426 during CDPK3 dependency analysis. Tabs include data subsets that were subjected to  
1427 thresholding for differential regulation and CDPK3 dependency. Includes data from TMT  
1428 sets 1 and 2.

1429

1430 **Data S3** – Phosphopeptide quantifications and calculated logFCs from WT/ $\Delta$ CDPK3  
1431 parasites subjected to A23187 treatment timecourse. Tabs include data subsets  
1432 subjected to thresholding for differential regulation and CDPK3 dependency.

1433

1434 **Table S1** – List of proteins (identified in A23187 timecourse) assigned to clusters  
1435 identified in the Gaussian mixture-model-based clustering analysis. The clusters are  
1436 listed across four different tabs based on whether they are differentially up- or down-  
1437 regulated and whether this shows CDPK3-dependency.

1438

1439 **Table S2** – Gene ontology analysis results of proteins found to be differentially up-  
1440 regulated in A23187 timecourse.

1441

1442 **Table S3** – Gene ontology analysis results of proteins found to be differentially down-  
1443 regulated in A23187 timecourse.

1444

1445 **Table S4** – Gene ontology analysis results of proteins found to be differentially up-  
1446 regulated and CDPK3 dependent in A23187 timecourse.

1447

1448 **Table S5** – Gene ontology analysis results of proteins found to be differentially down-  
1449 regulated and CDPK3 dependent in A23187 timecourse.

1450

1451 **Table S6** – List of primers used in this study
